# Supplementary material for: Double axial stabilization of a carbenium ion via convergent PO → C+ tetrel bonding
Source: Royal Society of Chemistry journal article supplement (doi:10.1039/d3cc04729f), 2023-12-08
Supplement: d3cc04729f1.pdf [file d3cc04729f1.pdf]

# Double axial stabilization of a carbenium ion via convergent P=O→C<sup>+</sup> tetrel bonding

Elishua D. Litle<sup>a</sup> and François P. Gabbaï<sup>\*a</sup>

Department of Chemistry, Texas A&M University, College Station, TX 77843

## Supporting Information

### Contents

|                                                                                                              |    |
|--------------------------------------------------------------------------------------------------------------|----|
| 1 Experimental .....                                                                                         | 2  |
| 1.1 General experimental .....                                                                               | 2  |
| 1.2 Syntheses .....                                                                                          | 2  |
| 2 NMR Spectra .....                                                                                          | 4  |
| 2.1 NMR spectra of products .....                                                                            | 4  |
| 3 UV-vis spectra .....                                                                                       | 14 |
| 4 pK <sub>R</sub> <sup>+</sup> measurements.....                                                             | 16 |
| 5 Cyclic voltammetry.....                                                                                    | 17 |
| 7 Computational studies .....                                                                                | 20 |
| 7.1 General methods .....                                                                                    | 20 |
| 7.2 Geometry-optimized structures .....                                                                      | 20 |
| 7.3 Electrostatic potential (ESP) maps .....                                                                 | 21 |
| 7.4 Cartesian coordinates of geometry optimized structures .....                                             | 23 |
| 8 X-ray diffraction analysis.....                                                                            | 26 |
| 8.1 Experimental details .....                                                                               | 26 |
| 8.2 Table showing the compounds characterized by X-ray diffraction and their corresponding CCDC numbers..... | 26 |
| 8.3 Solid-state structures.....                                                                              | 27 |
| 8.4 X-ray refinement parameters .....                                                                        | 28 |
| 9 References.....                                                                                            | 29 |

## 1 Experimental

### 1.1 General experimental

All reactions and manipulations were carried out under an atmosphere of dry, O<sub>2</sub>-free nitrogen using standard double-manifold techniques with a rotary oil pump unless otherwise stated. A nitrogen-filled glove box was used to manipulate solids, store air-sensitive starting materials, carry out room temperature reactions, recover reaction products and prepare samples for analysis. All solvents were dried by refluxing under N<sub>2</sub> over CaH<sub>2</sub> (CH<sub>3</sub>CN and CH<sub>2</sub>Cl<sub>2</sub>) or by refluxing under N<sub>2</sub> over Na/K (Et<sub>2</sub>O) and stored under a nitrogen atmosphere over 3Å molecular sieves. Deuterated solvents were distilled and/or dried over molecular sieves before use. Chemicals were purchased from commercial suppliers and used as received. <sup>1</sup>H, <sup>13</sup>C, and <sup>31</sup>P NMR spectra were recorded on a Bruker Avance II 400 and a Bruker Avance 500 cold probe. <sup>1</sup>H and <sup>13</sup>C chemical shifts are expressed as parts per million (ppm, δ) downfield of tetramethylsilane (TMS) and are referenced to CD<sub>3</sub>CN (1.94/1.32 ppm) or CD<sub>2</sub>Cl<sub>2</sub> (5.32/53.84 ppm) as internal standards. <sup>31</sup>P NMR chemical shifts are references against H<sub>3</sub>PO<sub>4</sub>. All coupling constants are absolute values and are expressed in Hertz (Hz). Mass spectrometry analyses were performed in-house at the Center for Mass Spectrometry using a Thermo Scientific Q Exactive Focus instrument. Elemental analyses were performed by Atlantic Microlab (Norcross, GA). Compound **1** was prepared according to a literature procedure.<sup>1</sup>

### 1.2 Syntheses

#### Synthesis of [2][BF<sub>4</sub>]

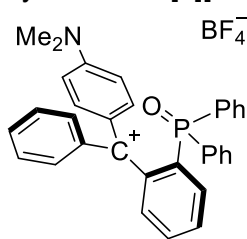

Compound [2][BF<sub>4</sub>] was synthesized by treating a CH<sub>3</sub>CN (2 mL) solution of **1** (97.5 mg, 0.2 mmol) with 30% H<sub>2</sub>O<sub>2</sub> in H<sub>2</sub>O (6.8 mg, 0.2 mmol). After stirring at ambient temperature for 3 hours, the resulting mixture was treated with HBF<sub>4</sub> (50% w/w in H<sub>2</sub>O, 17.6 mg, 0.2 mmol) and stirred for 15 mins at which point trifluoroacetic anhydride (0.1 mL) was added to scavenge any water. Addition of Et<sub>2</sub>O (10 mL) triggered the precipitation of an orange solid that was then filtered and washed with Et<sub>2</sub>O (3x1 mL). Subsequent drying under vacuum afforded [2][BF<sub>4</sub>]. Orange, needle-like single crystals were obtained by slow evaporation of an acetonitrile and Et<sub>2</sub>O solution of [2][BF<sub>4</sub>]. Yield: 40 mg, 70 μmol, 35%. <sup>1</sup>H

**NMR** (500 MHz, CD<sub>3</sub>CN, 298 K) δ/ppm: 7.71 (tt, *J* = 7.7, 1.4 Hz, 1H), 7.65 – 7.55 (m, 2H), 7.55 – 7.48 (m, 1H), 7.48 – 7.30 (m, 16H), 7.28 (ddd, *J* = 7.6, 3.6, 1.2 Hz, 1H), 6.79 (d, *J* = 9.6 Hz, 2H), 3.43 (s, 6H). <sup>13</sup>C **NMR** (126 MHz, CD<sub>3</sub>CN, 298 K) δ/ppm: 176.35 (s), 161.42 (s), 144.55 (d, *J* = 6.2 Hz), 143.05 (s), 138.92 (s), 135.40 (s), 135.30 (s), 133.61 (s), 133.05 (d, *J* = 2.9 Hz), 132.99 (s), 132.98 (s), 132.90 (s), 132.71 (s), 132.63 (s), 132.42 (s), 132.34 (s), 131.18 (s), 130.77 (s), 130.68 (s), 129.70 (s), 129.59 (d, *J* = 2.4 Hz), 129.48 (s), 129.21 (s), 43.26 (s). <sup>31</sup>P **NMR** (162 MHz, CD<sub>3</sub>CN, 298 K) δ/ppm: 28.10 (s). **HRMS** (ESI+) *m/z* calculated for [M]<sup>+</sup> [C<sub>33</sub>H<sub>29</sub>NOP]<sup>+</sup>: 486.1981, found: 486.1975.

#### Synthesis of [2]OH

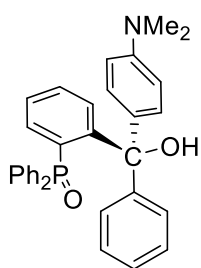

Compound [2]OH was synthesized by treating a CH<sub>3</sub>CN (2 mL) solution of **1** (48.4 mg, 0.1 mmol) with an excess of 30% H<sub>2</sub>O<sub>2</sub> in H<sub>2</sub>O (0.2 mmol). The reaction was stirred for 15 min. and brought to dryness. The residue was dissolved in acetonitrile. The resulting solution was left open to the atmosphere, leading to slow evaporation of the solvent and formation of colorless, block-like single crystals [2]OH. Yield: 5.4 mg, 10 μmol, 10.0%. <sup>1</sup>H **NMR** (500 MHz, CD<sub>2</sub>Cl<sub>2</sub>, 298 K) δ/ppm: 8.74 (s, 1H), 7.57 – 7.42 (m, 2H), 7.40 – 7.19 (m, 11H), 7.18 – 7.01 (m, 5H), 6.98 – 6.84 (m, 8H), 6.46 – 6.29 (m, 2H), 2.86 (s, 6H). <sup>13</sup>C **NMR** (126 MHz, CD<sub>2</sub>Cl<sub>2</sub>, 298 K) δ/ppm: 156.34 (d, *J* = 6.2 Hz), 149.78 (s), 148.04 (s), 136.55 (d, *J* = 13.8 Hz), 134.87 (s), 134.02 (s), 133.21 (d, *J* = 9.3 Hz), 132.39 (s), 132.12 (s), 132.08 (s), 132.04 (s), 132.01 (s),

131.97 (s), 131.94 (s), 131.89 (s), 131.19 (d, *J* = 2.8 Hz), 130.28 (s), 129.51 (s), 129.39 (s), 128.83 (s), 128.72 (s), 128.63 (s), 127.59 (s), 127.05 (s), 126.18 (d, *J* = 13.5 Hz), 111.51 (s), 82.50 (d, *J* = 3.2 Hz), 40.58 (s). <sup>31</sup>P **NMR** (202 MHz, CD<sub>2</sub>Cl<sub>2</sub>, 298 K) δ/ppm: 36.89 (s). **HRMS** (ESI+) *m/z* calculated for [M]<sup>+</sup> [C<sub>33</sub>H<sub>29</sub>NO<sub>2</sub>P]<sup>+</sup>: 502.1930, found: 502.1916.

### Synthesis of **3**

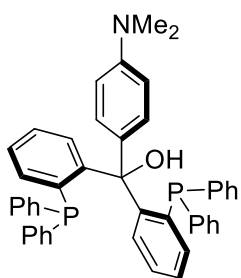

(2-bromophenyl)diphenylphosphane (2.0 g, 5.86 mmol) was placed in a 200 mL Shlenk tube and dissolved in 20 mL of ether under nitrogen while stirring. The flask was cooled to 0 °C and a solution of BuLi in hexanes (2.6 mL, 6.68 mmol) was added dropwise. After stirring for 6 hours at this temperature, a diethylether solution (8 mL) of ethyl 4-(dimethylamino)benzoate (0.51 g, 2.64 mmol) was slowly added. After an additional 2 hours of stirring, distilled H<sub>2</sub>O (12 mL) was added to the solution. This addition triggered the formation of a precipitate which was isolated by filtration, washed with hexanes, and then dried under vacuum. This protocol afforded **3** in 94.2% yield (1.67 g). Single crystals of **3** were obtained by slow evaporation of a Benzene/CH<sub>2</sub>Cl<sub>2</sub> mixture at low temperature. **<sup>1</sup>H NMR** (400 MHz, CD<sub>2</sub>Cl<sub>2</sub>, 298 K) δ/ppm: 7.34 – 7.13 (m, 21H), 7.10 (td, *J* = 7.9, 1.6 Hz, 4H), 6.98 (s, 2H), 6.79 (ddd, *J* = 7.7, 4.7, 1.4 Hz, 2H), 6.56 (d, *J* = 8.6 Hz, 2H), 6.26 (t, *J* = 9.7 Hz, 1H), 2.95 (s, 6H), 2.16 (s, 1H). **<sup>13</sup>C NMR** (126 MHz, CDCl<sub>3</sub>, 298 K) δ/ppm: 153.90 (d, *J* = 21.7 Hz), 149.34 (s), 138.87 (d, *J* = 11.8 Hz), 137.79 (s), 137.70 (s), 136.72 (d, *J* = 18.2 Hz), 135.96 (s), 133.59 (d, *J* = 20.0 Hz), 133.32 (d, *J* = 18.7 Hz), 129.64 (d, *J* = 7.3 Hz), 129.53 (s), 128.05 (d, *J* = 5.8 Hz), 127.96 (d, *J* = 4.4 Hz), 127.88 (s), 127.73 (d, *J* = 5.1 Hz), 127.06 (s), 111.71 (s), 85.53 (s), 40.63 (s). **<sup>31</sup>P NMR** (162 MHz, CD<sub>2</sub>Cl<sub>2</sub>, 298 K) δ/ppm: -14.24 (s). **Elemental Analysis** calculated: C: 80.46; H: 5.85; N: 2.09. Found: C: 80.36; H: 5.94; N: 2.11.

### Synthesis of [4][BF<sub>4</sub>]

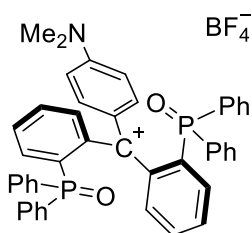

Compound [4][BF<sub>4</sub>] was synthesized by treating a CH<sub>3</sub>CN (2 mL) solution of **3** (134 mg, 0.2 mmol) with 30% H<sub>2</sub>O<sub>2</sub> in H<sub>2</sub>O (6.8 mg, 0.2 mmol). After stirring at ambient temperature for 15 min, the resulting mixture was treated with HBF<sub>4</sub> (52% w/w in Et<sub>2</sub>O, 32 mg, 0.4 mmol) and stirred for 15 min at which point trifluoroacetic anhydride (0.1 mL) was added to scavenge any water. Addition of Et<sub>2</sub>O (10 mL) triggered the precipitation of an orange solid that was then filtered and washed with Et<sub>2</sub>O (3x1 mL). Subsequent drying under vacuum afforded [4][BF<sub>4</sub>]. Yield: 153 mg, 198 μmol, 99%. Orange, block-like single crystals were obtained by slow evaporation of an acetonitrile solution of [4][BF<sub>4</sub>]. **<sup>1</sup>H NMR** (400 MHz, CD<sub>3</sub>CN, 298 K) δ/ppm: 8.42 (ddd, *J* = 7.9, 3.7, 1.2 Hz, 2H), 7.72 (tt, *J* = 7.7, 1.5 Hz, 2H), 7.65 – 7.43 (m, 18H), 7.38 (dddd, *J* = 9.0, 7.8, 4.6, 1.5 Hz, 6H), 6.47 (d, *J* = 9.9 Hz, 2H), 5.76 (d, *J* = 9.9 Hz, 2H), 3.23 (s, 6H). **<sup>13</sup>C NMR** (126 MHz, CD<sub>3</sub>CN, 298 K) δ/ppm: 175.48 (t, *J* = 3.5 Hz), 161.06 (s), 143.99 (d, *J* = 5.9 Hz), 140.59 (s), 135.51 (s), 135.27 (d, *J* = 12.1 Hz), 134.67 (s), 134.39 (s), 134.31 (s), 133.91 (s), 133.61 (s), 133.22 (s), 132.80 (d, *J* = 2.8 Hz), 132.51 (d, *J* = 2.8 Hz), 132.41 (s), 132.37 (s), 132.31 (d, *J* = 1.8 Hz), 132.23 (s), 132.21 (s), 130.19 (d, *J* = 12.1 Hz), 129.38 (d, *J* = 12.2 Hz), 129.15 (d, *J* = 12.1 Hz), 115.57 (s), 42.70 (s). **<sup>31</sup>P NMR** (162 MHz, CD<sub>3</sub>CN, 298 K) δ/ppm: 28.45 (s). **HRMS** (ESI+) *m/z* calculated for [M]<sup>+</sup> [C<sub>45</sub>H<sub>38</sub>NO<sub>2</sub>P<sub>2</sub>]<sup>+</sup>: 686.2372, found: 686.2359.

### Synthesis of [4]OH

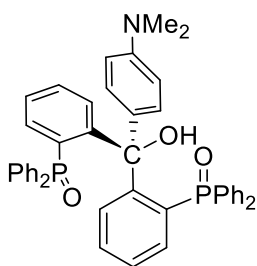

Compound [4]OH was synthesized by treating a CH<sub>3</sub>CN (2 mL) solution of **3** (67.9 mg, 0.1 mmol) with an excess of 30% H<sub>2</sub>O<sub>2</sub> in H<sub>2</sub>O (0.2 mmol). The reaction was stirred for 15 min. and brought to dryness. The residue was dissolved in acetonitrile. The resulting solution was left open to the atmosphere, leading to slow evaporation of the solvent and formation of colorless, needle-like single crystals of [4]OH. Yield: 8.2 mg, 12 μmol, 11.6%. Single crystals suitable for X-ray diffraction were obtained by vapor diffusion of C<sub>6</sub>H<sub>6</sub> into a CH<sub>2</sub>Cl<sub>2</sub> solution of [4]OH. **<sup>1</sup>H NMR** (500 MHz, CD<sub>2</sub>Cl<sub>2</sub>, 298 K) δ/ppm: 8.83 (s, 1H), 8.32 (s, 1H), 7.68 (s, 2H), 7.59 – 6.98 (m, 23H), 6.96 – 6.73 (m, 2H), 6.56 (s, 1H), 5.83 (s, 1H), 5.52 (s, 1H), 2.78 (s, 6H). **<sup>13</sup>C NMR** (126 MHz, CD<sub>2</sub>Cl<sub>2</sub>, 298 K) δ/ppm: 149.70 (s), 138.26 (br, s), 137.22 (br, s), 136.32 (br, s), 135.64 (br, s), 134.60 (s), 132.64 (s), 131.36 (s), 130.82 (s), 129.88 (br, s), 128.38 (br, s), 126.96 (br, s), 126.10 (br, s), 112.50 (br, s), 109.59 (br, s), 83.63 (s), 40.34 (s). **<sup>31</sup>P NMR** (162 MHz, CD<sub>2</sub>Cl<sub>2</sub>, 298 K) δ/ppm: 35.55 (s), 35.54 (s). **HRMS** (ESI+) *m/z* calculated for [M+H]<sup>+</sup> [C<sub>45</sub>H<sub>39</sub>NO<sub>3</sub>P<sub>2</sub>]<sup>+</sup>: 704.2466, found: 704.2478.

## 2 NMR Spectra

### 2.1 NMR spectra of products

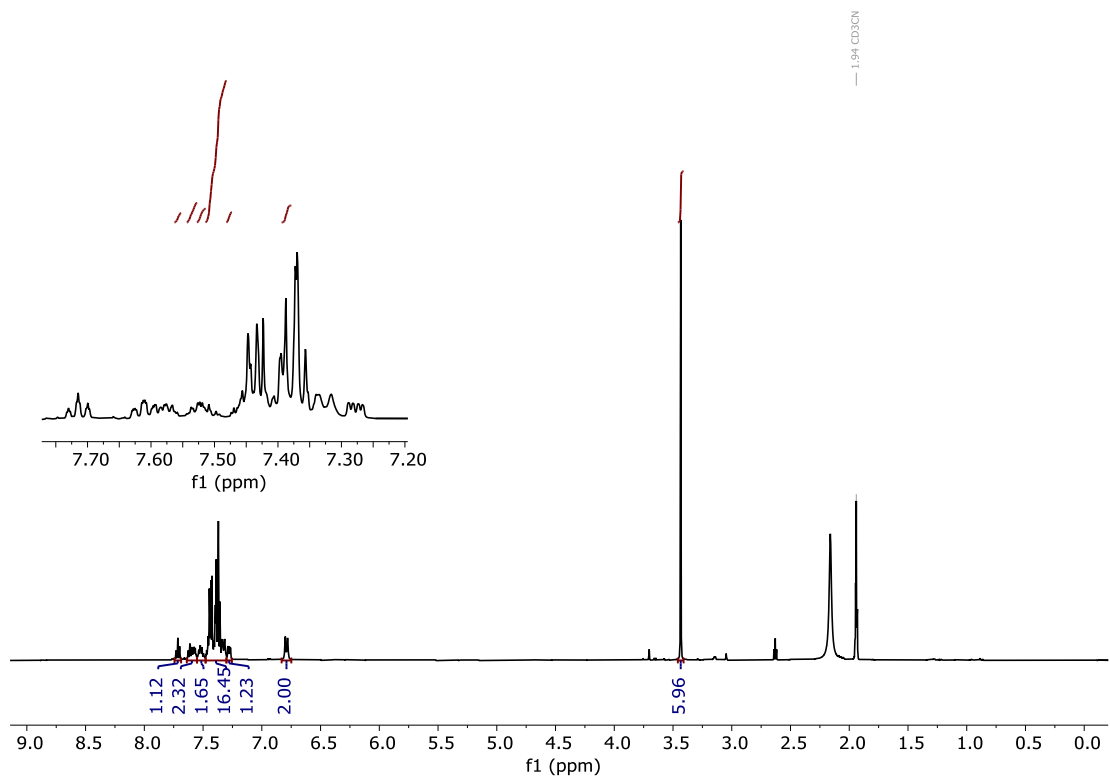

Figure S1.  $^1\text{H}$  NMR (500 MHz,  $\text{CD}_3\text{CN}$ , 298 K) spectrum of  $[\mathbf{2}][\text{BF}_4]$ .

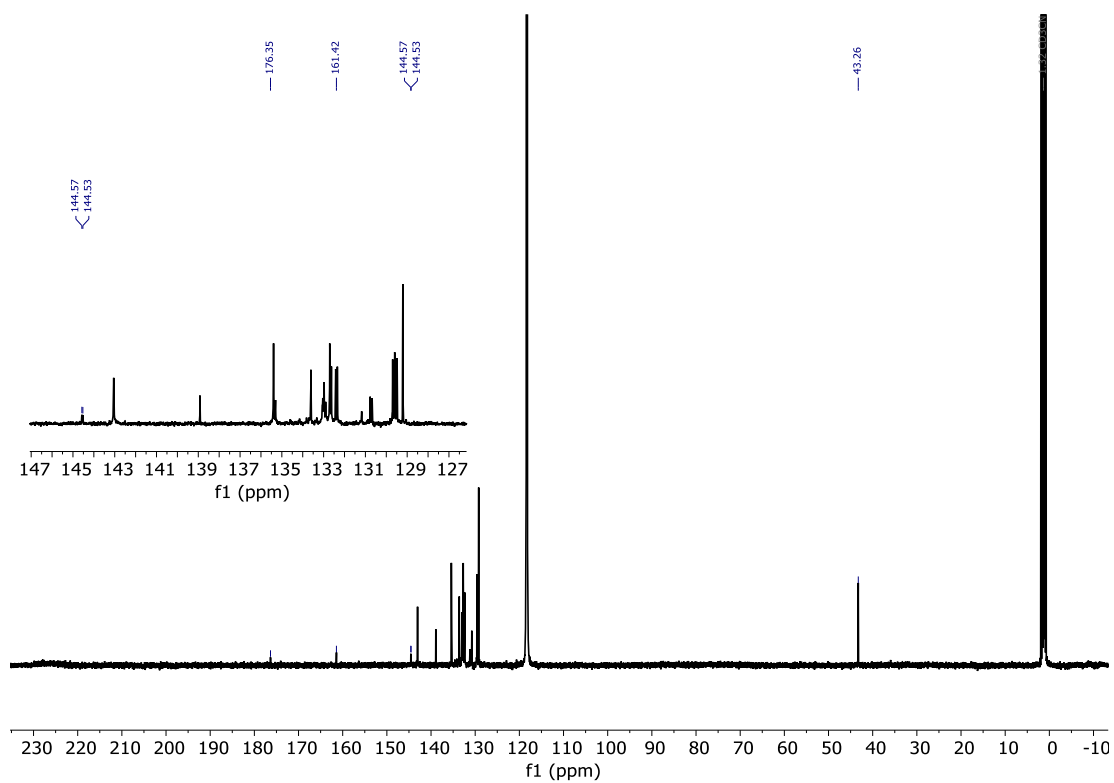

Figure S2.  $^{13}\text{C}$  NMR (126 MHz,  $\text{CD}_3\text{CN}$ , 298 K) spectrum of  $[\mathbf{2}][\text{BF}_4]$ .

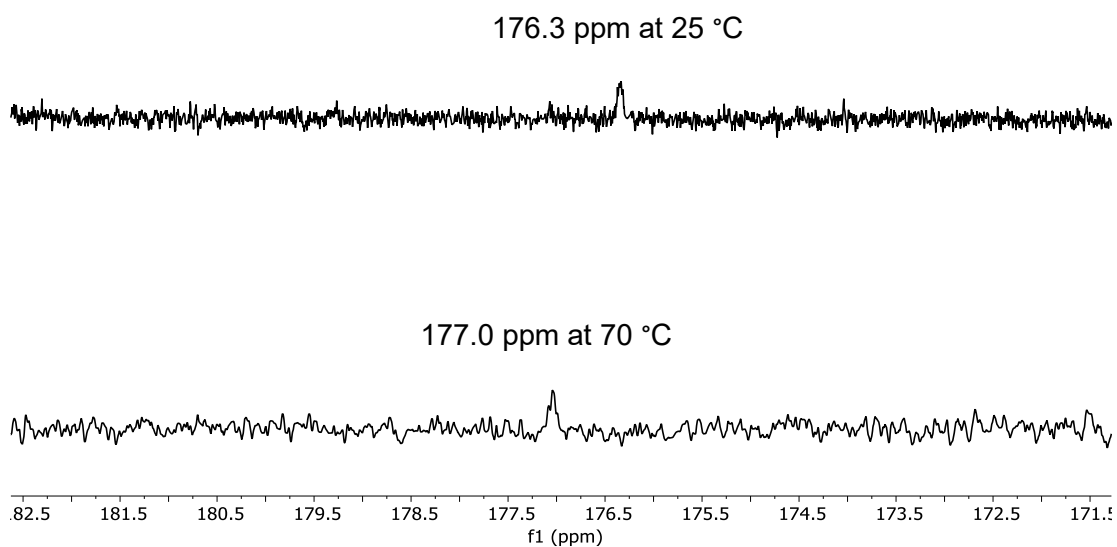

Figure S3.  $^{13}\text{C}$  NMR (126 MHz,  $\text{CD}_3\text{CN}$ ) spectrum of the  $[\mathbf{2}][\text{BF}_4]$  focused on the carbenium signal.

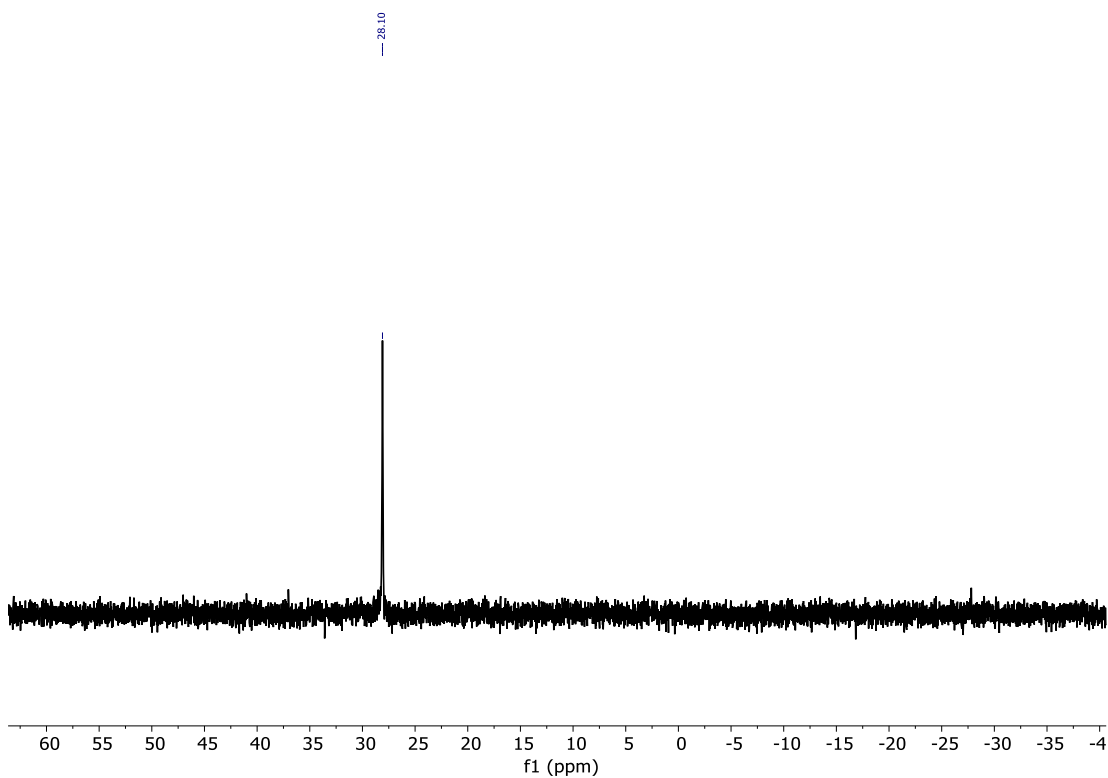

Figure S4.  $^{31}\text{P}$  NMR (162 MHz,  $\text{CD}_3\text{CN}$ , 298 K) spectrum of  $[\mathbf{2}][\text{BF}_4]$ .

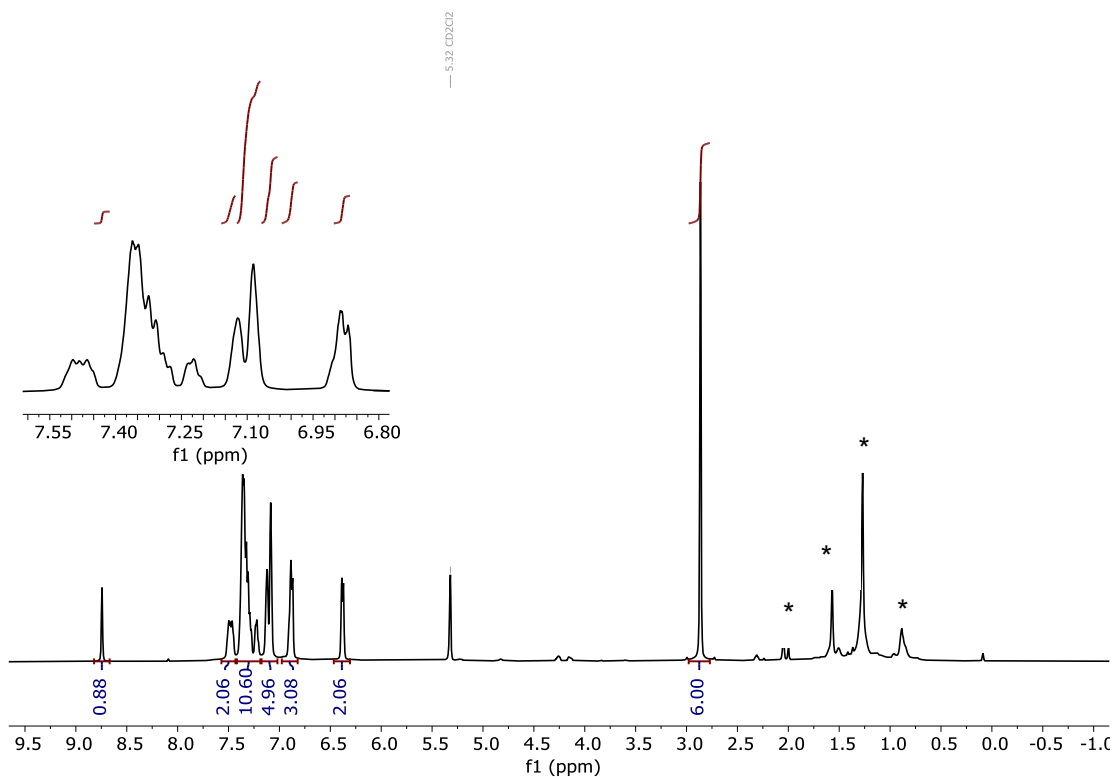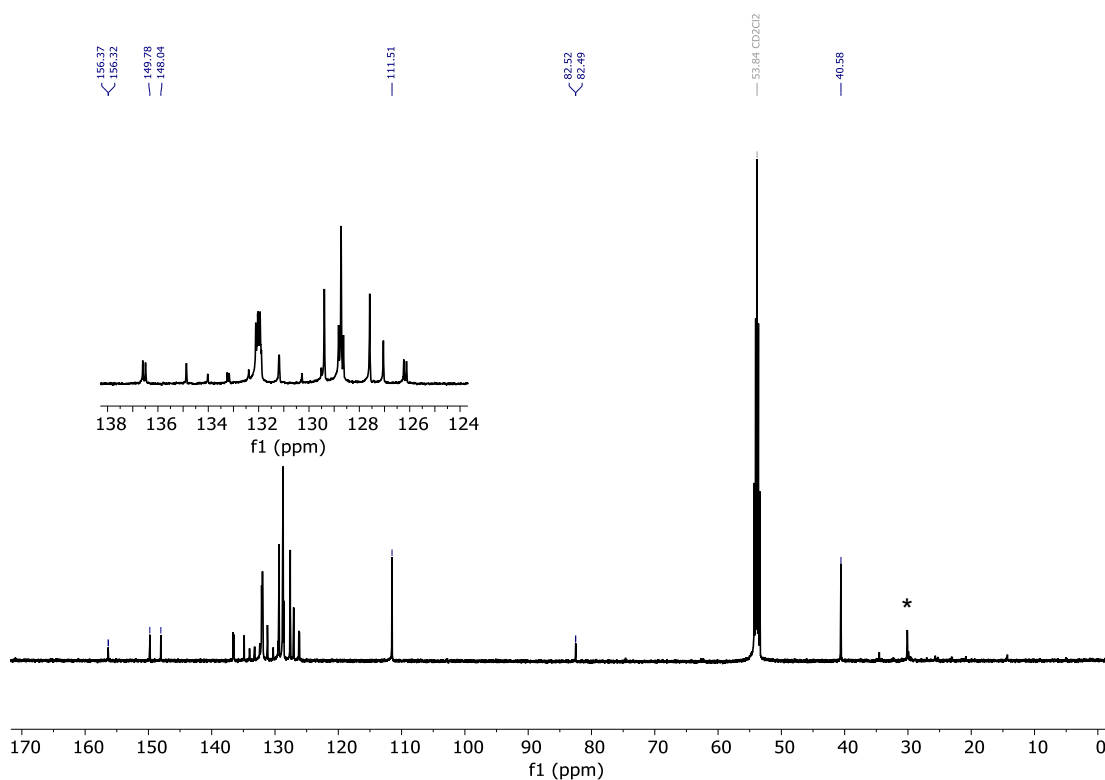

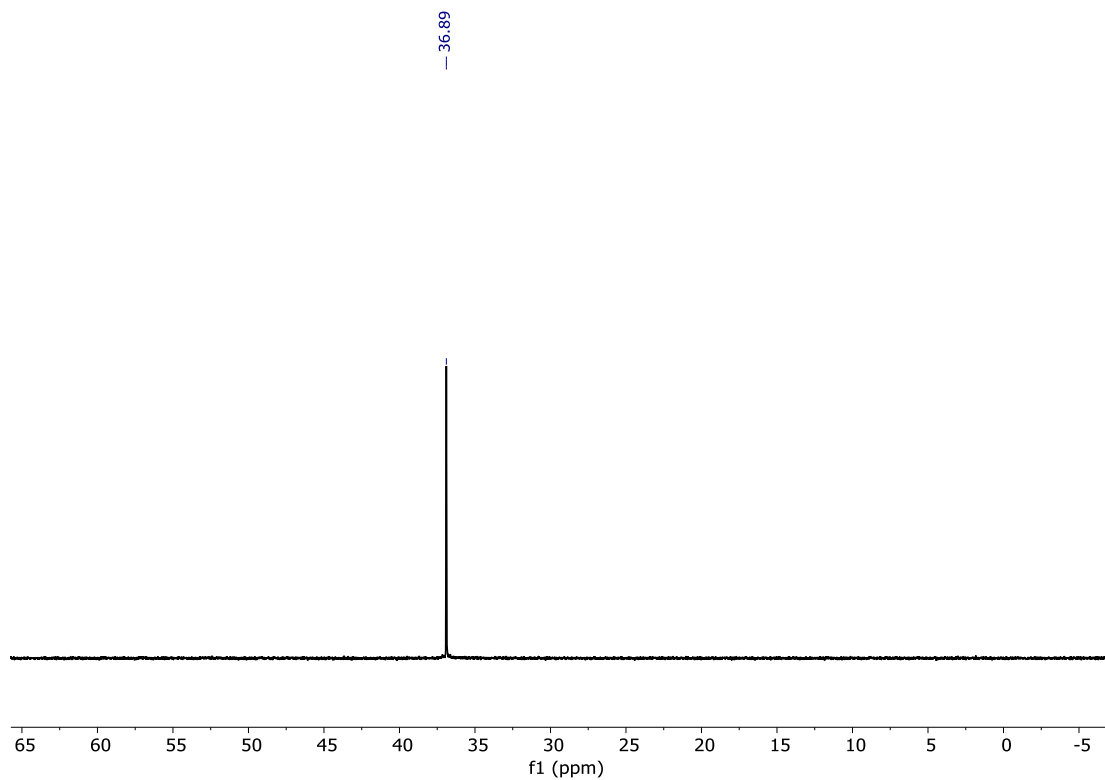

Figure S7.  $^{31}\text{P}$  NMR (202 MHz,  $\text{CD}_2\text{Cl}_2$ , 298 K) spectrum of **[2]OH**.

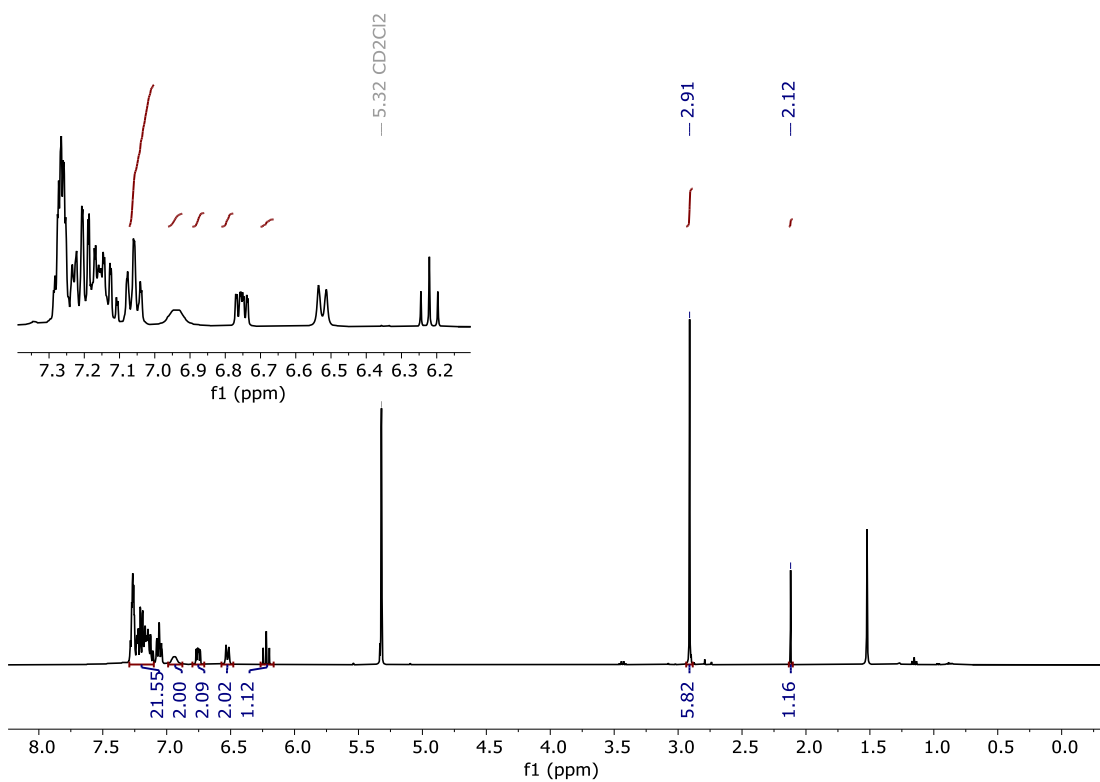

Figure S8.  $^1\text{H}$  NMR (400 MHz,  $\text{CD}_2\text{Cl}_2$ , 298 K) spectrum of **3**.

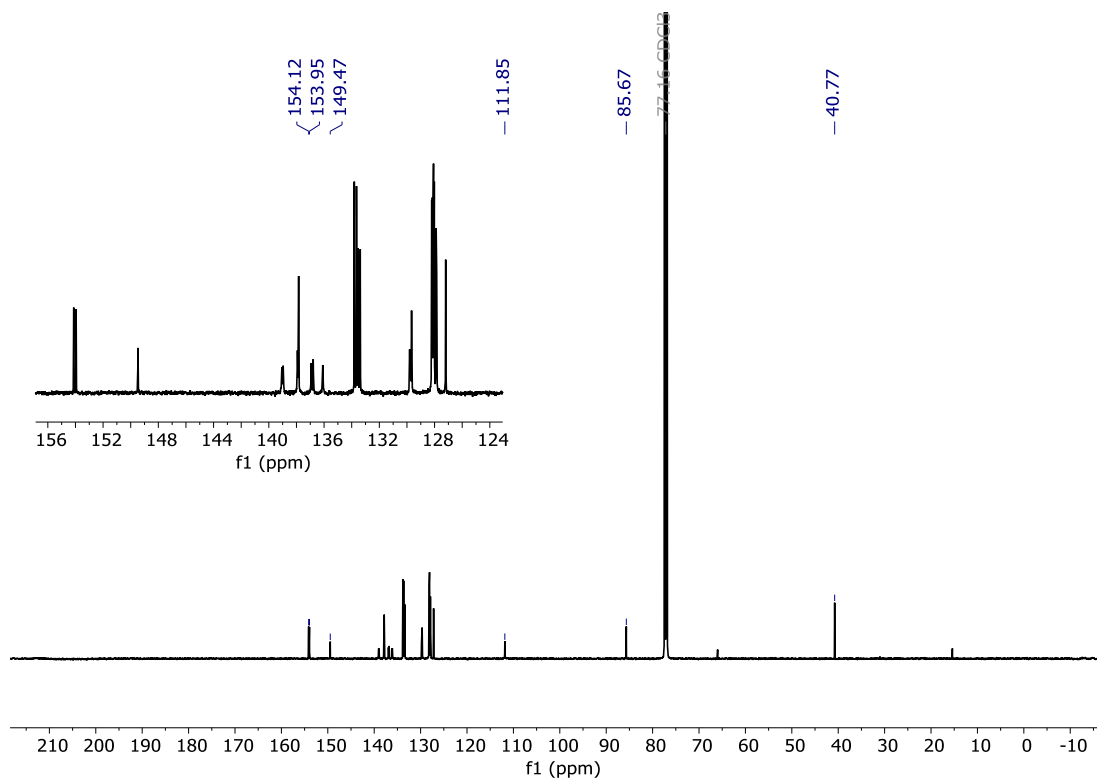

Figure S9.  $^{13}\text{C}$  NMR (126 MHz,  $\text{CDCl}_3$ , 298 K) spectrum of **3**.

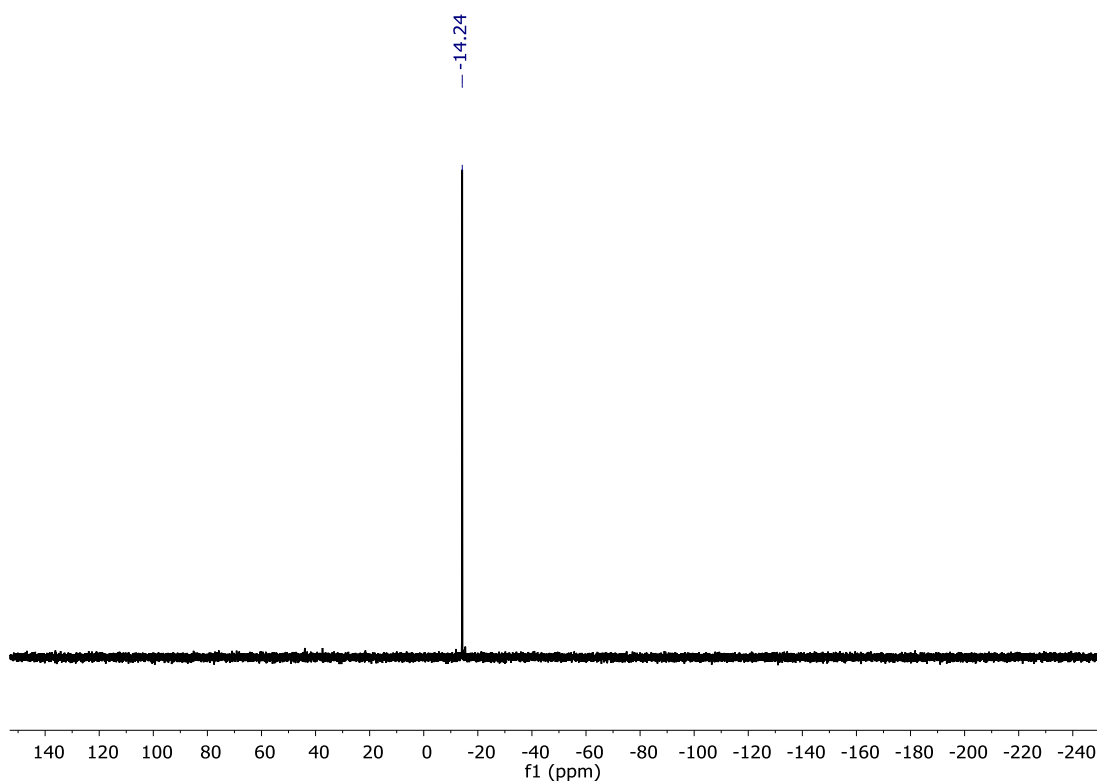

Figure S10.  $^{31}\text{P}$  NMR (162 MHz,  $\text{CD}_2\text{Cl}_2$ , 298 K) spectrum of **3**.



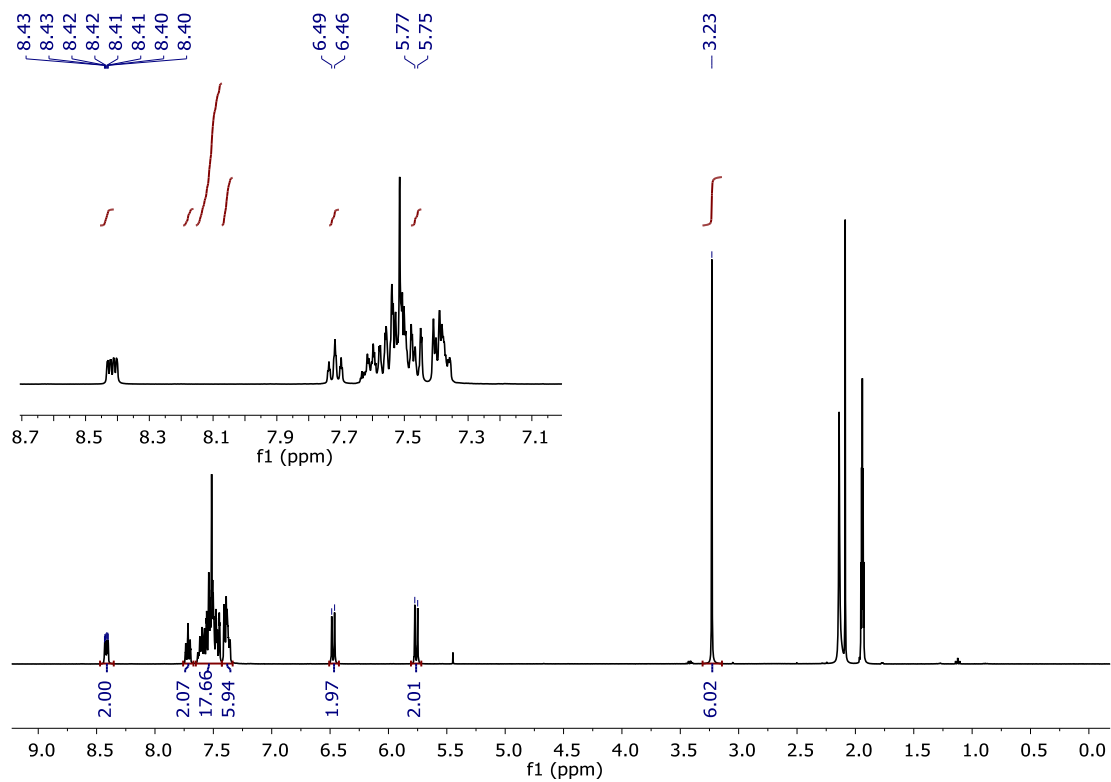

Figure S11.  $^1\text{H}$  NMR (400 MHz,  $\text{CD}_3\text{CN}$ , 298 K) spectrum of  $[\mathbf{4}][\text{BF}_4]$ .

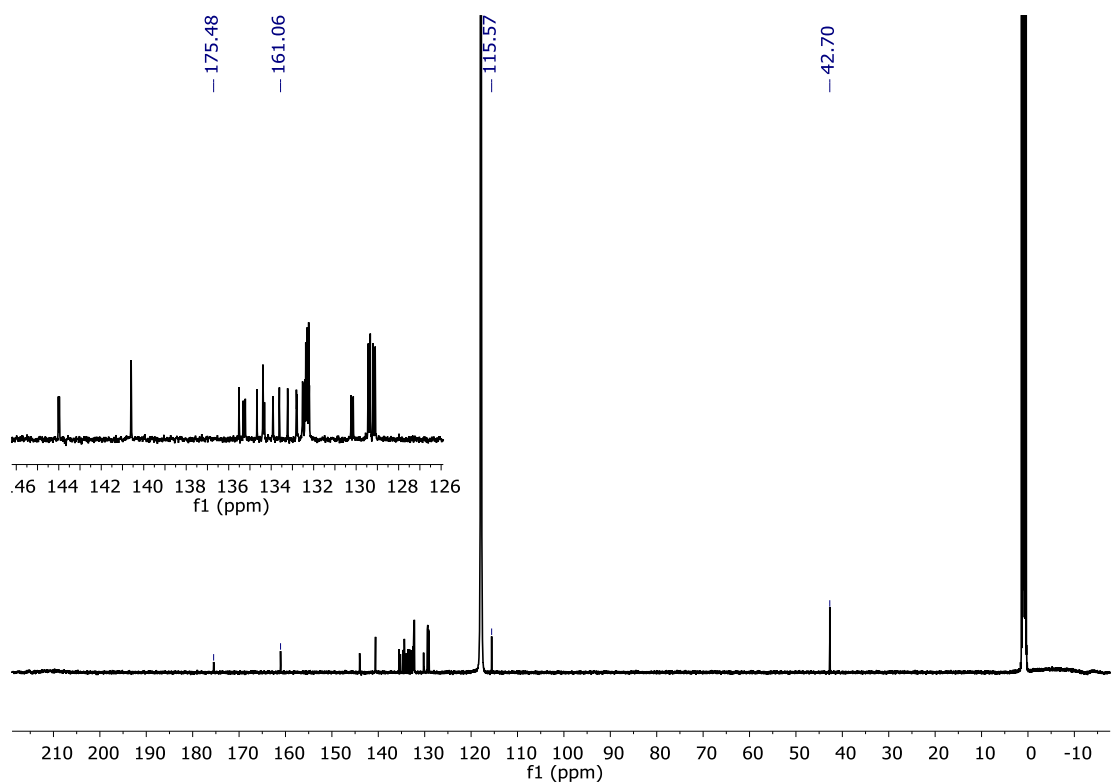

Figure S12.  $^{13}\text{C}$  NMR (126 MHz,  $\text{CD}_3\text{CN}$ , 298 K) spectrum of  $[\mathbf{4}][\text{BF}_4]$ .

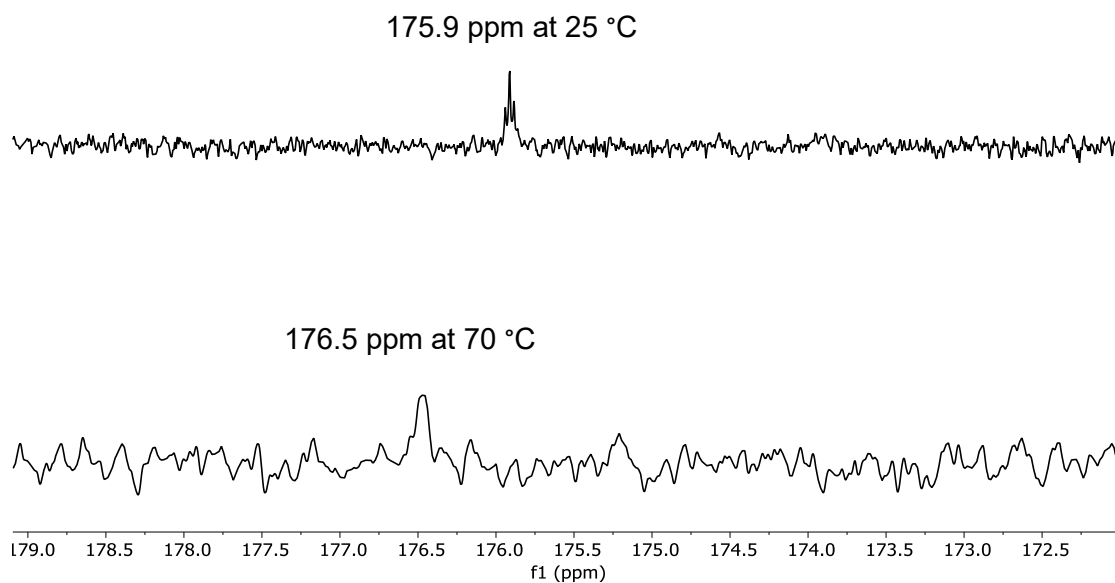

Figure S13.  $^{13}\text{C}$  NMR (126 MHz,  $\text{CD}_3\text{CN}$ ) spectrum of the  $[\mathbf{4}][\text{BF}_4]$  focused on the carbenium signal.

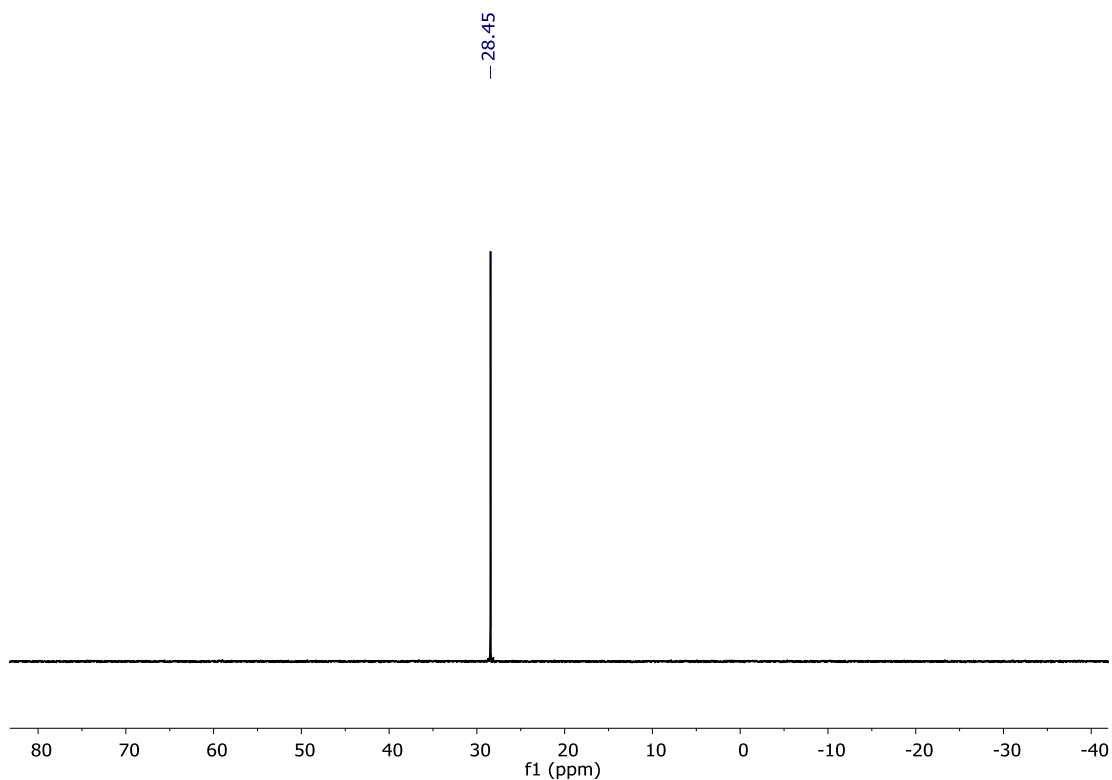

Figure S14.  $^{31}\text{P}$  NMR (162 MHz,  $\text{CD}_3\text{CN}$ , 298 K) spectrum of  $[\mathbf{4}][\text{BF}_4]$ .

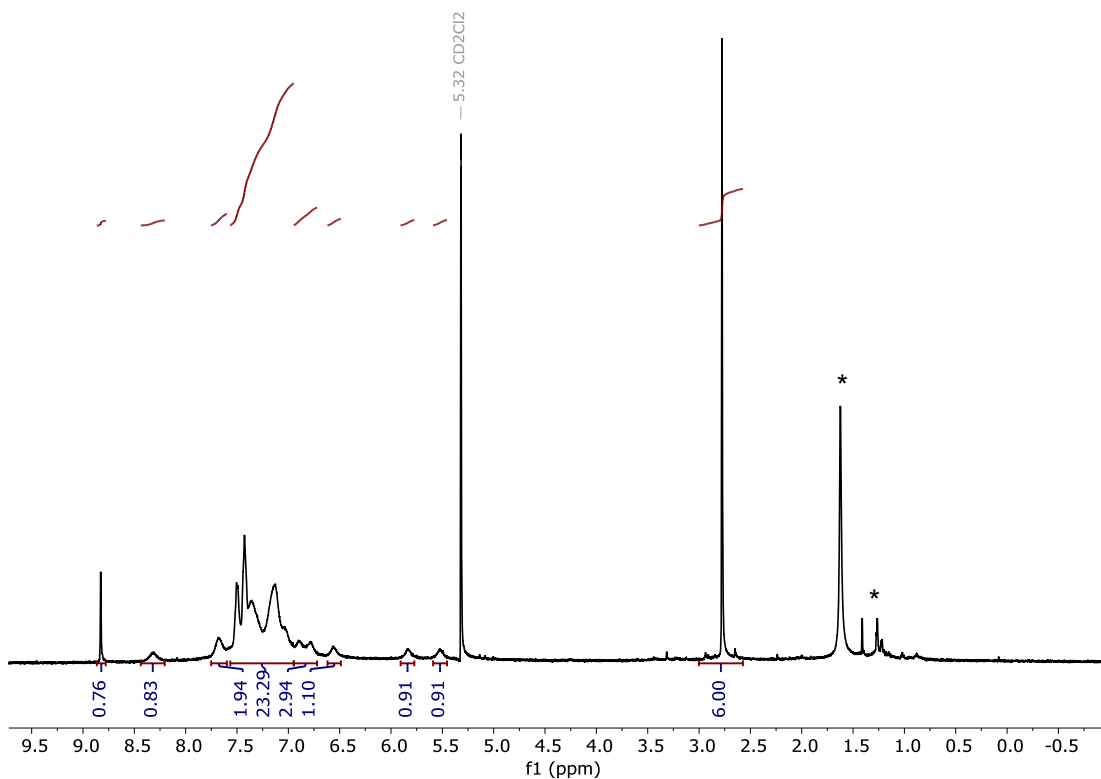

Figure S15.  $^1\text{H}$  NMR (500 MHz,  $\text{CD}_2\text{Cl}_2$ , 298 K) spectrum of [4]OH. \* solvent impurities.

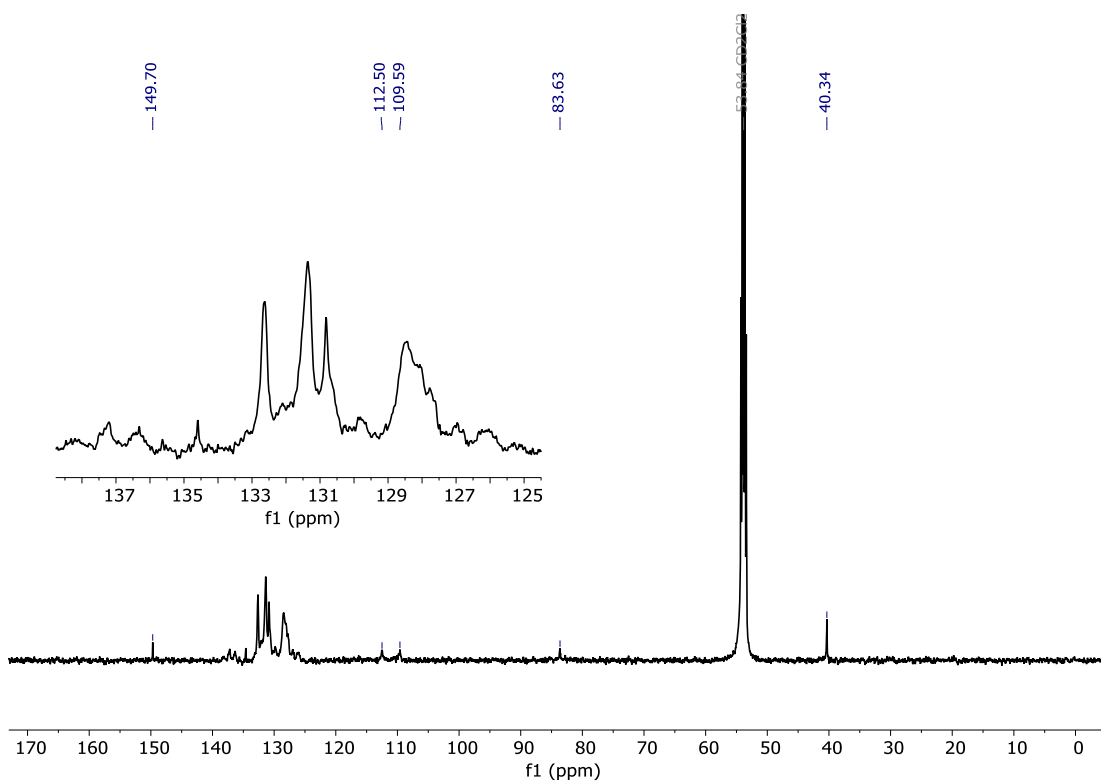

Figure S16.  $^{13}\text{C}$  NMR (126 MHz,  $\text{CD}_2\text{Cl}_2$ , 298 K) spectrum of [4]OH.

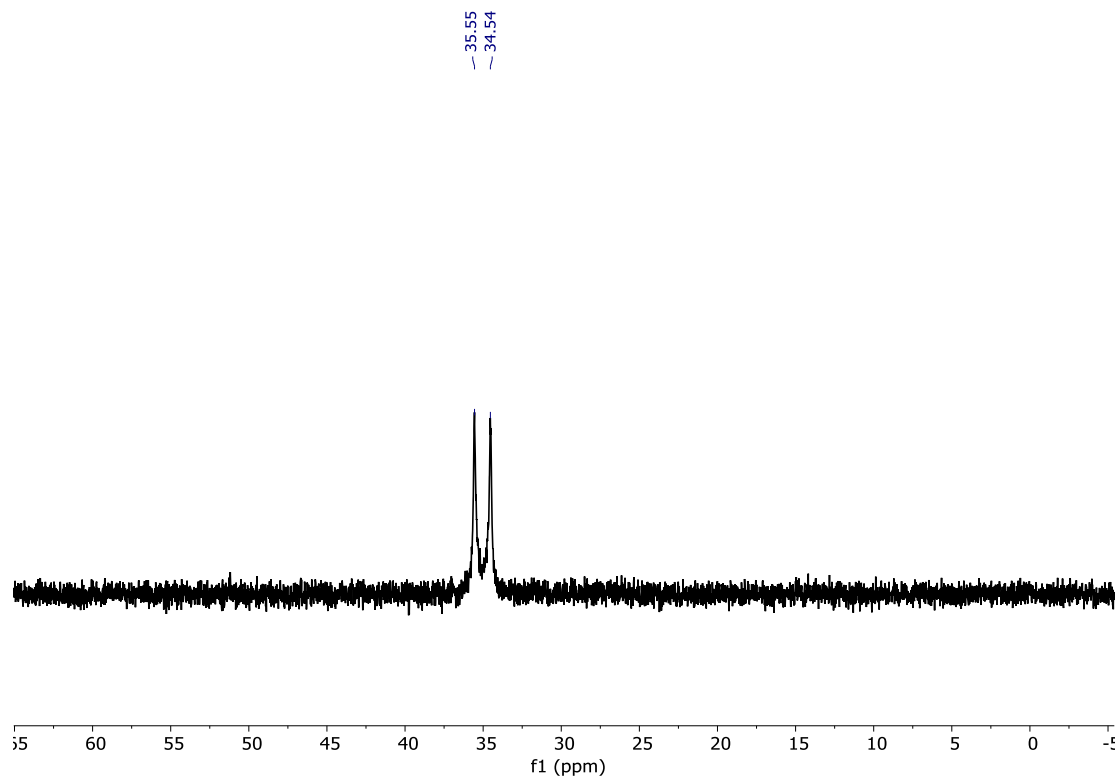

Figure S17.  $^{31}\text{P}$  NMR (202 MHz,  $\text{CD}_2\text{Cl}_2$ , 298 K) spectrum of **[4]OH**.

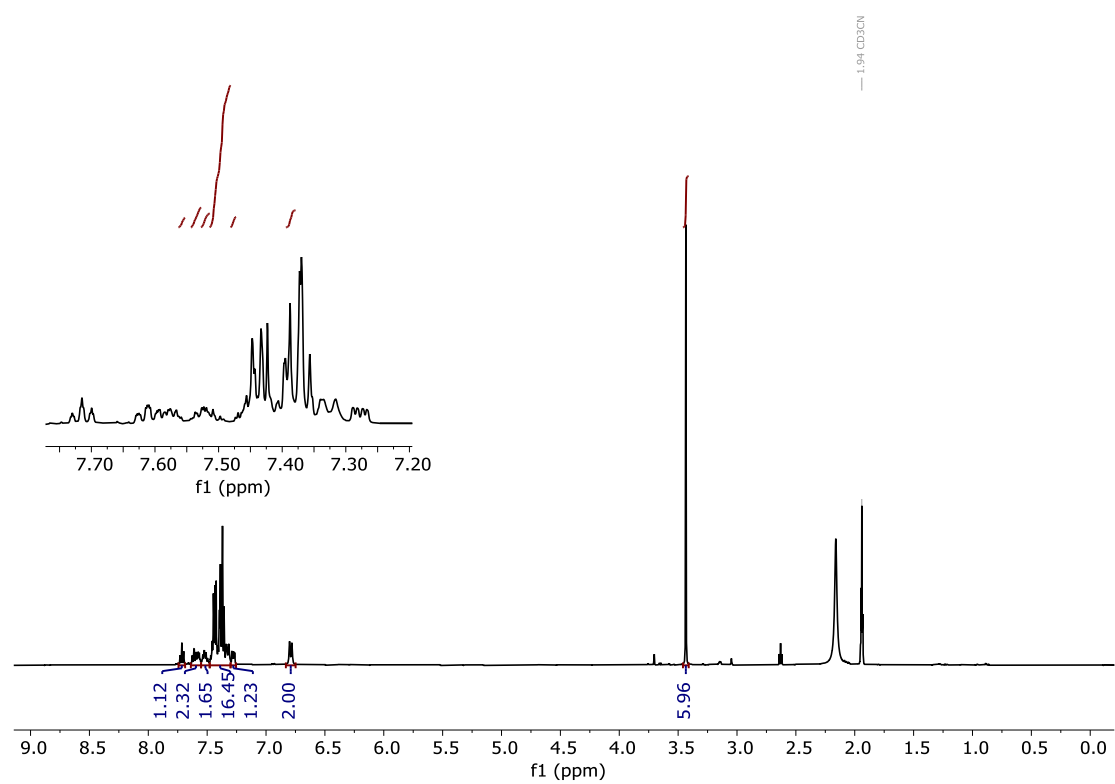

Figure S18.  $^1\text{H}$  NMR (500 MHz,  $\text{CD}_3\text{CN}$ , 298 K) spectrum of **[5][BF<sub>4</sub>]**.

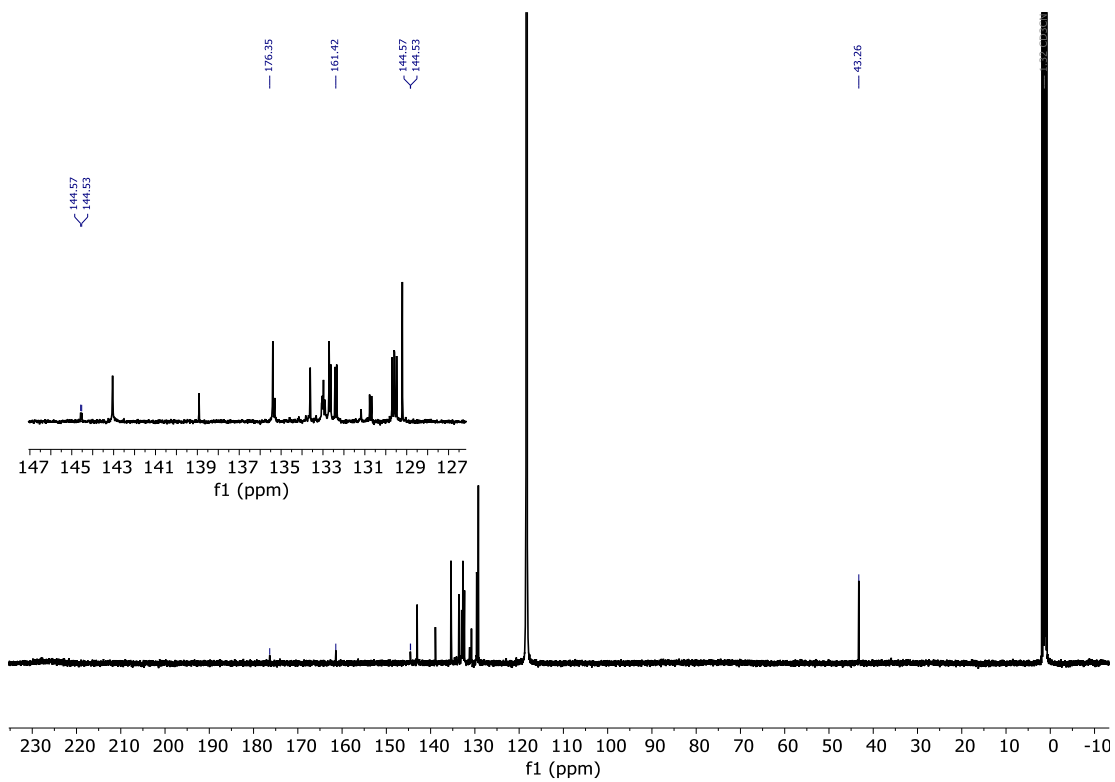

Figure S19.  $^{13}\text{C}$  NMR (126 MHz,  $\text{CD}_3\text{CN}$ , 298 K) spectrum of  $[\mathbf{5}][\text{BF}_4]$ .

### 3 UV-vis spectra

UV-Vis absorbance spectra were recorded on a Shimadzu UV-2502PC UV-Vis spectrophotometer. Spectra were collected at a concentration of  $5 \times 10^{-5}$  M in acetonitrile using a 1cm quartz cuvette.

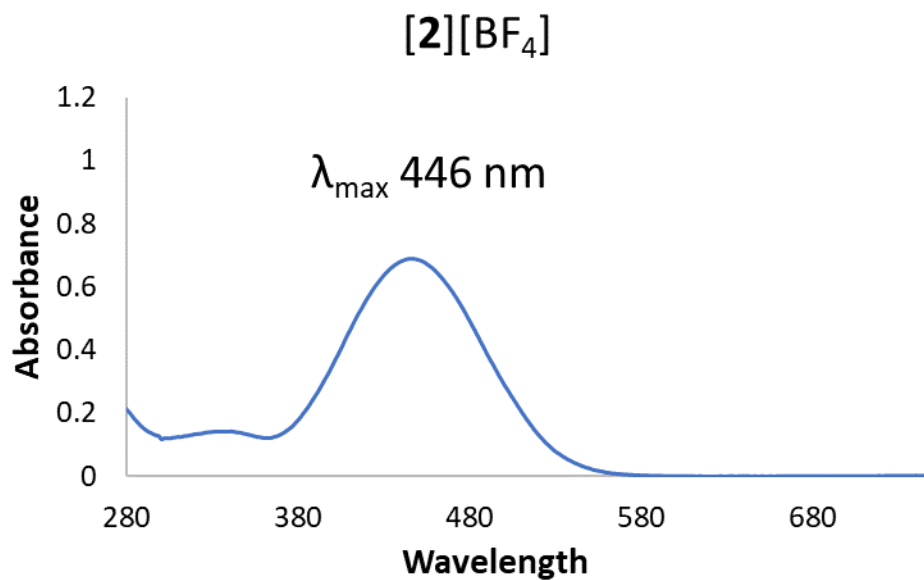

Figure S20. UV-vis spectrum of [2][BF<sub>4</sub>].

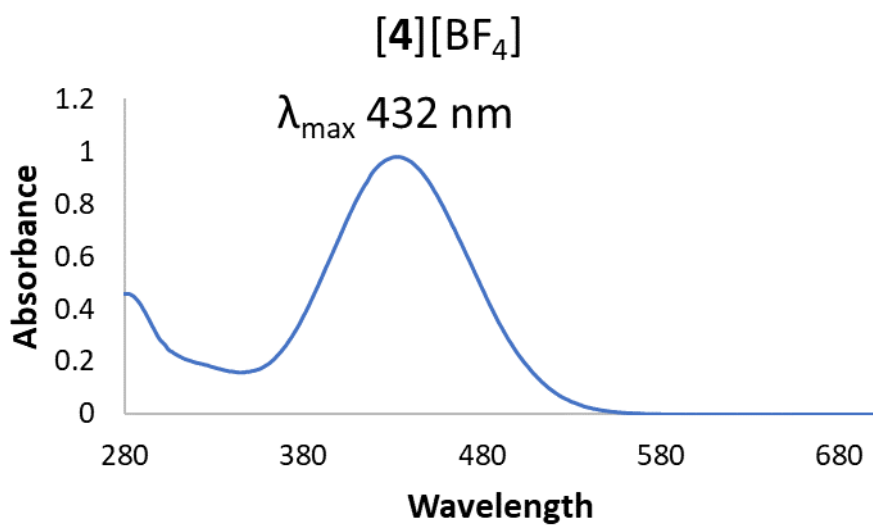

Figure S21. UV-vis spectrum of [4][BF<sub>4</sub>].

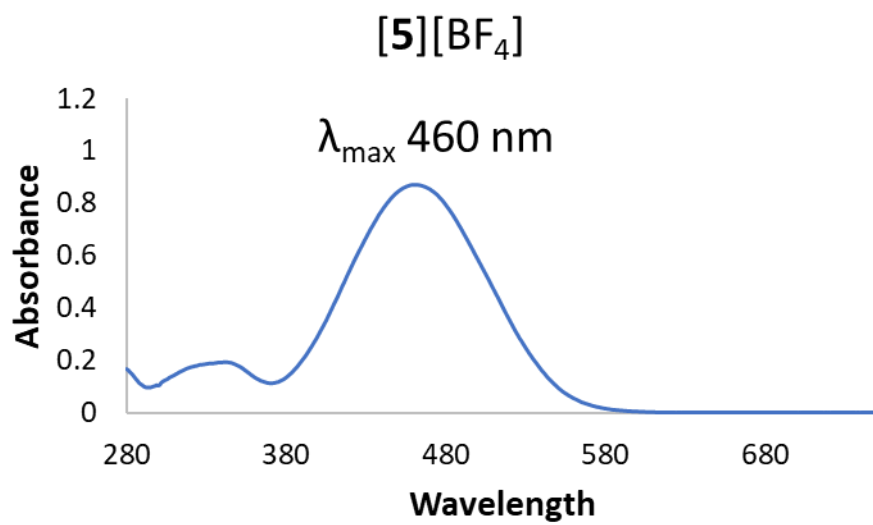

Figure S22. UV-vis spectrum of [5][BF<sub>4</sub>].

#### 4 $pK_{R^+}$ measurements

The carbenium salts (4.55  $\mu\text{mol}$  of **[2]** $[\text{BF}_4]$ , **[4]** $[\text{BF}_4]$  and **[5]** $[\text{BF}_4]$ ) were dissolved in acetonitrile (2 mL). 30  $\mu\text{L}$  of the resulting acetonitrile solution was added to a solution consisting of water and a citric acid buffer solution (9 mM, 2.7 mL) affording a final concentration of 25  $\mu\text{M}$  for the carbenium ions. The solution was titrated by incremental addition of a solution of NaOH in water. The solutions were buffered in order to obtain a better control of the pH near the equivalence point.

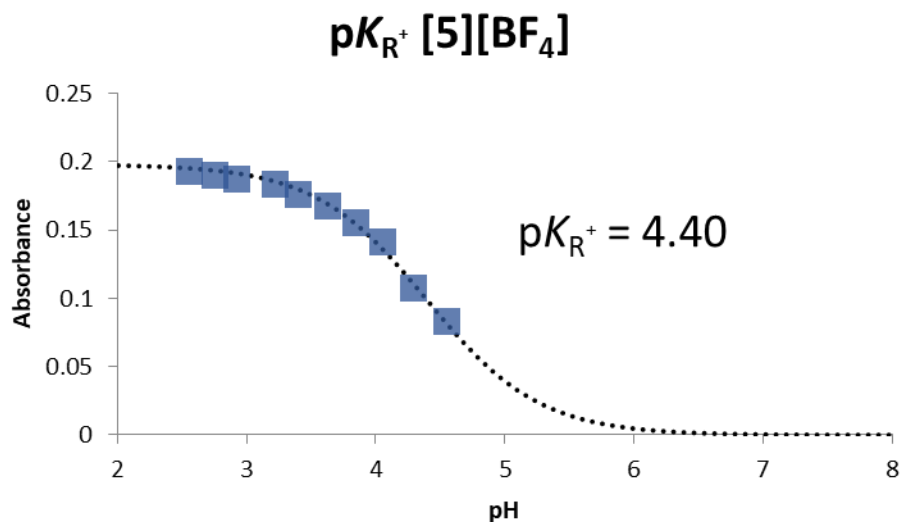

Figure S23. Spectrophotometric titration curve of **[5]** $[\text{BF}_4]$  in  $\text{H}_2\text{O}/\text{MeCN}$  9:1 (v/v) upon incremental additions of NaOH dissolved in  $\text{H}_2\text{O}$ . The absorbance was measured at 460 nm.



## 5 Cyclic voltammetry

Cyclic voltammetry measurements were recorded with a Pine instruments WaveNow potentiostat, using a glassy carbon working electrode, an Ag pseudo reference electrode and a platinum wire as the auxiliary electrode. Solutions of the concentration  $5 \times 10^{-4}$  M were prepared in dried and degassed solutions of dichloromethane with 100 mM TBAPF<sub>6</sub> as the supporting electrolyte. The voltammograms were collected at a scan rate of 500 mV/s. All potentials were referenced against Fc/Fc<sup>+</sup> in the same solvent. All CV measurements were carried out inside a glove box. Differential Pulse Voltammetry (DPV) was performed with the same samples on a CH Instruments (Model 660 D) electrochemical analyzer. Using the parameters: Amplitude (V) = 0.05; Pulse Width (sec) = 0.05; Sample Width (sec) = 0.0167; Pulse Period (sec) = 0.2; Quiet Time (sec) = 2; Sensitivity (A/V) = 1e-6.

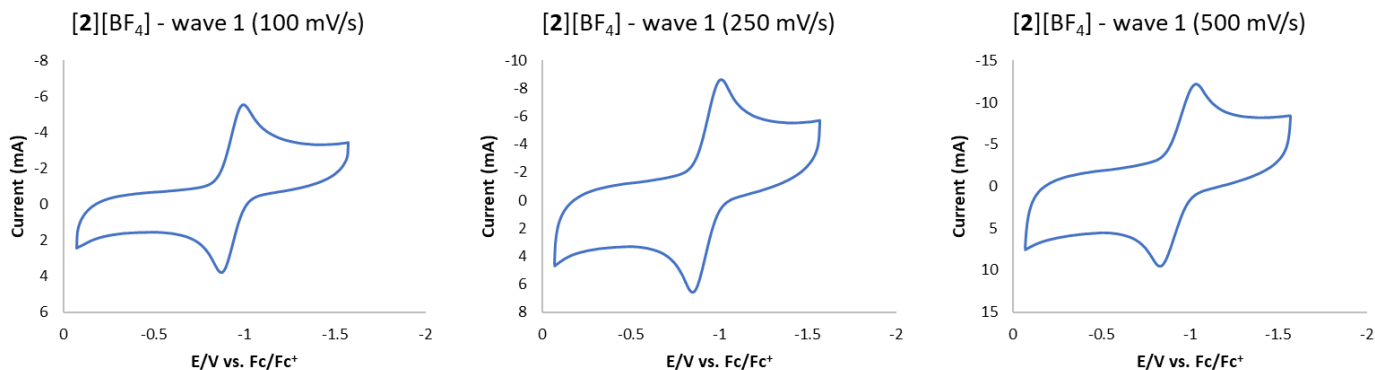

Figure S24. Cyclic voltammogram of the first reduction wave of [2][BF<sub>4</sub>].

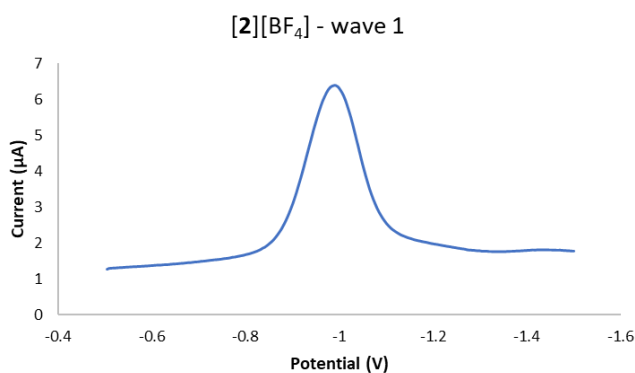

Figure S25. Differential Pulse Voltammetry of the first reduction wave of [2][BF<sub>4</sub>].

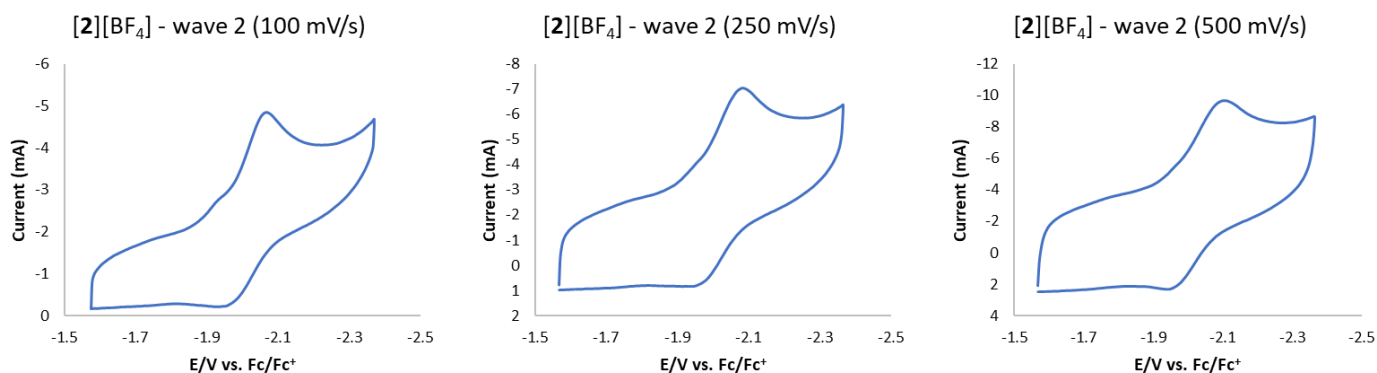

Figure S26. Cyclic voltammogram of the second reduction wave of [2][BF<sub>4</sub>].

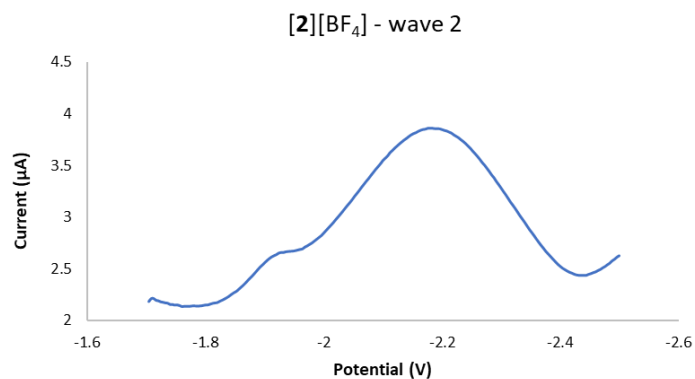

Figure S27. Differential Pulse Voltammetry of the second reduction wave of  $[2][BF_4]$ . We are not sure that the small shoulder around -2 V can be assigned to conformational switching.

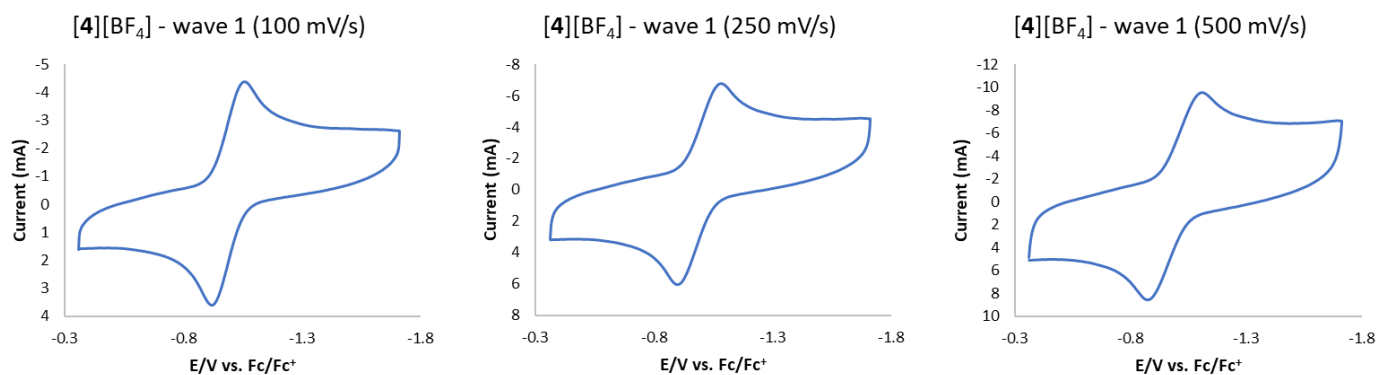

Figure S28. Cyclic voltammogram of the first reduction wave of  $[4][BF_4]$ .

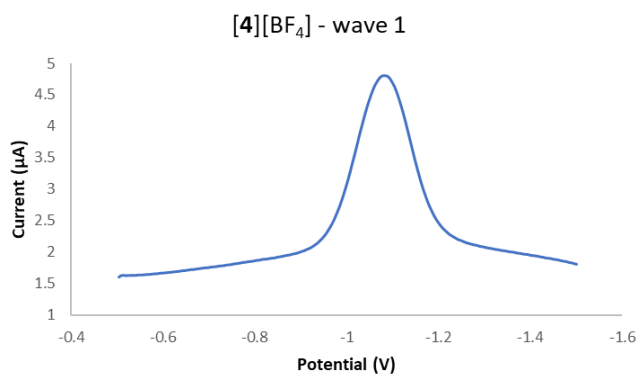

Figure S29. Differential Pulse Voltammetry of the first reduction wave of  $[4][BF_4]$ .

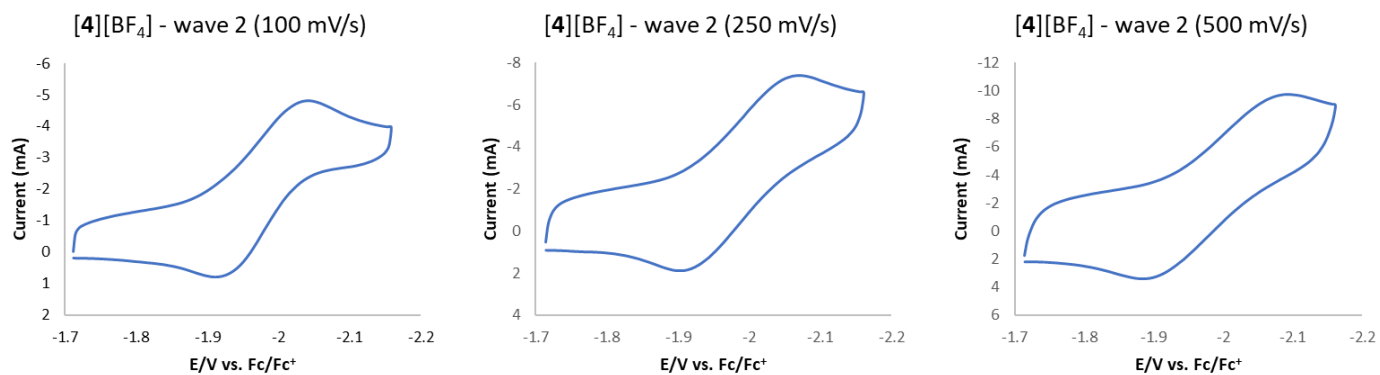

Figure S30. Cyclic voltammogram of the second reduction wave of  $[4][BF_4]$ .

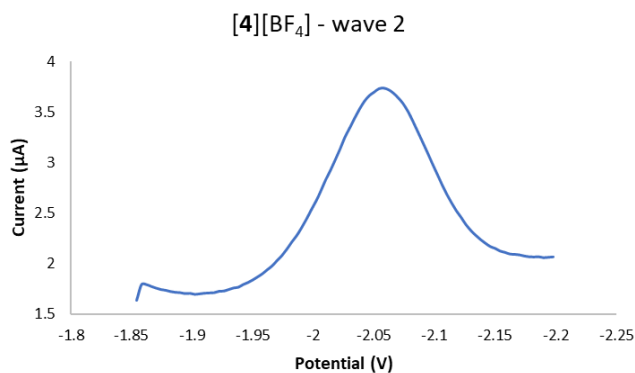

Figure S31. Differential Pulse Voltammetry of the second reduction wave of  $[4][BF_4]$ .

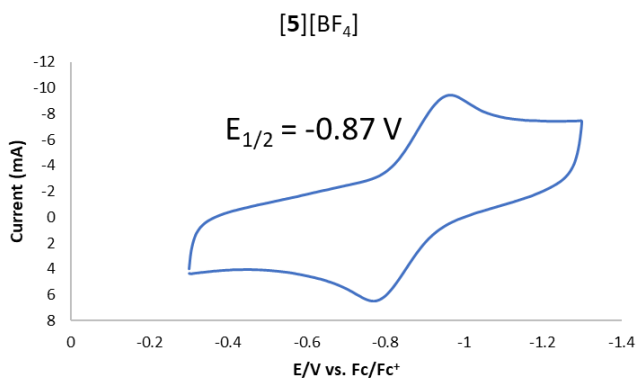

Figure S32. Cyclic voltammogram of the first reduction wave of  $[5][BF_4]$  at 500 mV/s.

## 7 Computational studies

### 7.1 General methods

The structures of **[2]<sup>+</sup>**, **[4]<sup>+</sup>** and **[5]<sup>+</sup>** were optimized using DFT methods as implemented in Gaussian 09 using the MPW1PW91 functional and a 6-311G(d,p) basis set with SMD solvation (solvent = dichloromethane). ESP maps were generated and visualized in GaussView 6.1.1.<sup>2</sup> Frequency calculations, performed using the same level of theory on the optimized geometries, found no imaginary frequencies. NBO analysis was performed using the same functional and basis set using the NBO 6.0 program.<sup>3</sup> The resulting NBOs were visualized using the Avogadro program.<sup>4</sup> QTAIM calculations were carried out on the wave functions derived from the optimized structures using the AIMAll program.<sup>5</sup>

### 7.2 Geometry-optimized structures

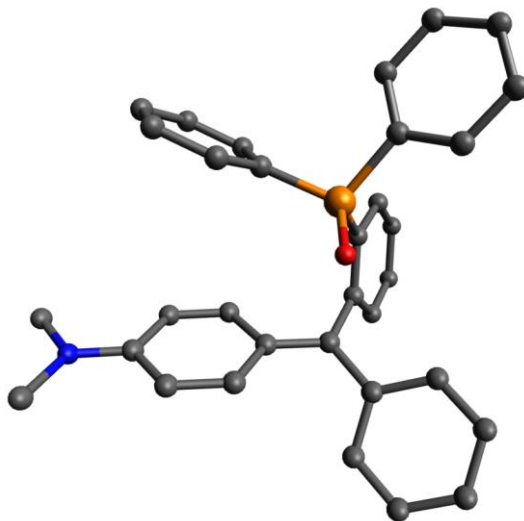

Figure S33. Optimized structure of **[2]<sup>+</sup>**. Hydrogen atoms were omitted for clarity.

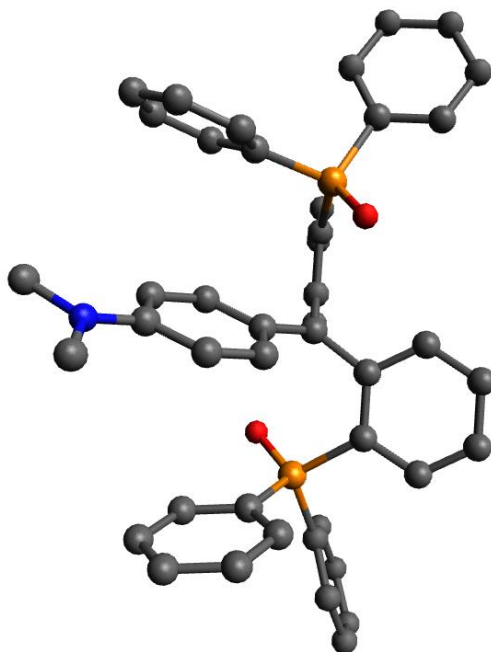

Figure S34. Optimized structure of **[4]<sup>+</sup>**. Hydrogen atoms were omitted for clarity.

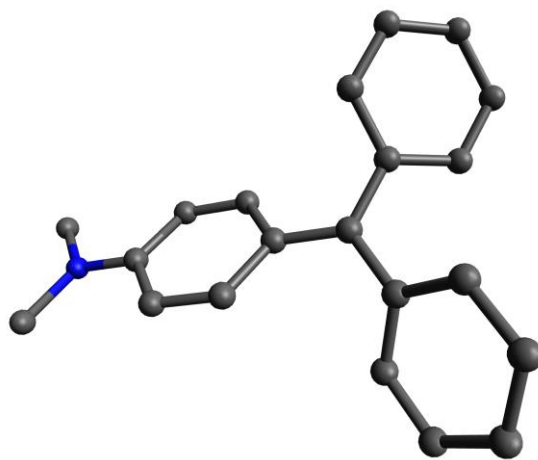

Figure S35. Optimized structure of [5]<sup>+</sup>. Hydrogen atoms were omitted for clarity.

### 7.3 Electrostatic potential (ESP) maps

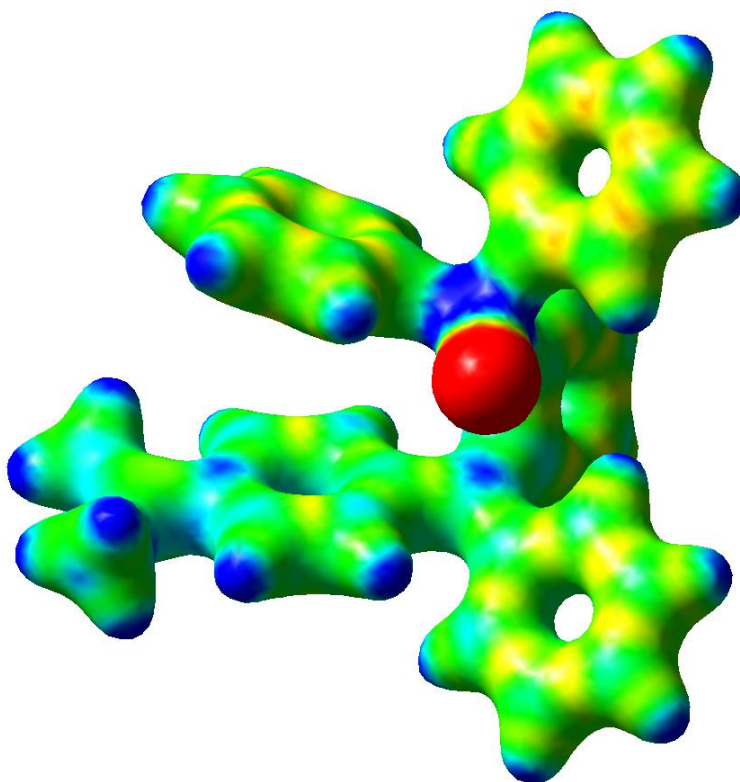

Figure S36. ESP map for compound [2]<sup>+</sup>. ESP maps are computed with an isovalue of 0.06 a.u., between a range of 0.12 to 0.46 a.u.

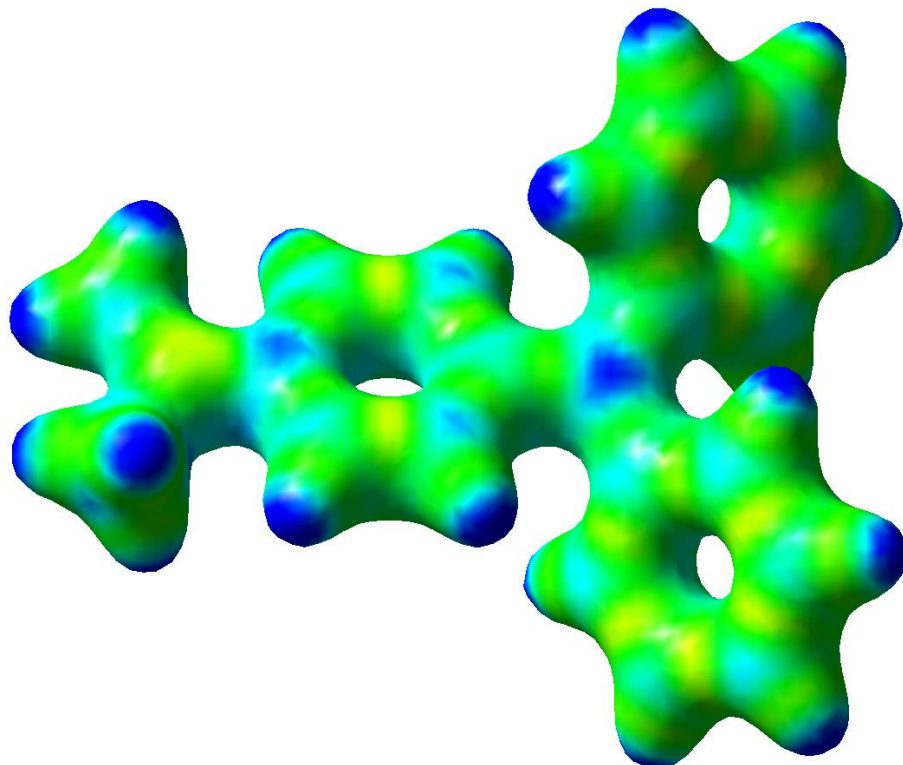

Figure S37. ESP map for compound [5]<sup>+</sup>. ESP maps are computed with an isovalue of 0.06 a.u., between a range of 0.12 to 0.46 a.u.

## 7.4 Cartesian coordinates of geometry optimized structures

Table S 1. Cartesian coordinates for compound [2]<sup>+</sup>.

| Atom Number | Coordinates |          |          | Atom Number | Coordinates |          |          |
|-------------|-------------|----------|----------|-------------|-------------|----------|----------|
|             | X           | Y        | Z        |             | X           | Y        | Z        |
| P1          | 1.39353     | -0.61789 | -0.41176 | C34         | -6.05715    | -1.03608 | -1.38353 |
| O2          | 0.81841     | 0.28807  | -1.47549 | C35         | 1.1407      | 4.83531  | -1.08332 |
| N3          | -5.17124    | -1.2587  | -0.23488 | C36         | 0.03899     | 5.67461  | -1.29207 |
| C4          | -1.66185    | 1.02872  | 0.25706  | H37         | -2.19144    | 1.84526  | -1.68767 |
| C5          | -0.5007     | 1.80689  | 0.43996  | H38         | 0.85218     | -2.48323 | 1.91113  |
| C6          | -2.50316    | 1.17705  | -0.89413 | H39         | -4.20339    | 0.54105  | -1.98042 |
| C7          | 0.46341     | -2.17847 | -0.19919 | H40         | 0.05265     | 3.01504  | 2.72097  |
| C8          | 0.38445     | -2.87895 | 1.01422  | H41         | 3.0324      | -0.87776 | 2.04386  |
| C9          | -3.63513    | 0.42564  | -1.06689 | H42         | -0.11296    | -2.15334 | -2.27798 |
| C10         | 0.68394     | 2.14229  | 2.58376  | H43         | -6.43723    | -2.79976 | 0.39589  |
| C11         | 1.3986      | 0.2588   | 1.21562  | H44         | -5.74315    | -1.85547 | 1.72281  |
| C12         | 0.5492      | 1.37573  | 1.41218  | H45         | -4.74138    | -3.03746 | 0.83876  |
| C13         | 2.33566     | -0.06164 | 2.208    | H46         | 1.66854     | 2.37934  | 4.48151  |
| C14         | -0.16369    | -2.70124 | -1.3417  | H47         | 3.11855     | -2.99587 | 0.27436  |
| C15         | 3.12519     | -1.08628 | -0.75095 | H48         | 3.15321     | 0.40324  | 4.14571  |
| C16         | -5.53744    | -2.29296 | 0.73956  | H49         | -1.324      | -4.31886 | -2.1607  |
| C17         | 1.59523     | 1.78378  | 3.577    | H50         | -0.35329    | -4.63382 | 2.0221   |
| C18         | 3.70505     | -2.28005 | -0.29377 | H51         | 3.42614     | 0.70538  | -1.91469 |
| C19         | 2.42287     | 0.6763   | 3.39049  | H52         | -1.44156    | -5.56421 | -0.01074 |
| C20         | -4.04064    | -0.5357  | -0.08342 | H53         | 5.48074     | -3.49611 | -0.23818 |
| C21         | -0.84975    | -3.9154  | -1.27087 | H54         | 5.80179     | 0.19473  | -2.42887 |
| C22         | -0.3031     | -4.0937  | 1.08119  | H55         | 6.8324      | -1.90415 | -1.58521 |
| C23         | 3.88733     | -0.19762 | -1.52678 | H56         | -1.43731    | -0.12381 | 2.08814  |
| C24         | -0.9173     | -4.61436 | -0.06153 | H57         | -3.455      | -1.42553 | 1.82706  |
| C25         | 5.03901     | -2.56898 | -0.59064 | H58         | 1.81486     | 2.92616  | -0.36733 |
| C26         | 5.21915     | -0.49244 | -1.82288 | H59         | -2.09383    | 5.9129   | -1.06084 |
| C27         | 5.79734     | -1.67453 | -1.3509  | H60         | -6.9547     | -1.63925 | -1.26007 |
| C28         | -2.04481    | 0.02394  | 1.20242  | H61         | -5.5721     | -1.32644 | -2.32238 |
| C29         | -3.192      | -0.71135 | 1.05828  | H62         | -6.35821    | 0.01391  | -1.44717 |
| C30         | 0.96388     | 3.5808   | -0.51303 | H63         | 2.13566     | 5.16421  | -1.36564 |
| C31         | -1.43057    | 3.9858   | -0.38025 | H64         | 0.18242     | 6.66023  | -1.72428 |
| C32         | -0.32962    | 3.12022  | -0.17159 | H65         | -2.42061    | 3.68356  | -0.05677 |
| C33         | -1.24357    | 5.25133  | -0.9288  |             |             |          |          |

Table S 2. Cartesian coordinates for compound [4]<sup>+</sup>.

| Atom Number | Coordinates |          |          | Atom Number | Coordinates |          |          |
|-------------|-------------|----------|----------|-------------|-------------|----------|----------|
|             | X           | Y        | Z        |             | X           | Y        | Z        |
| P1          | -3.22376    | -0.62661 | -0.41056 | C45         | 4.49079     | 2.49133  | -2.00672 |
| P2          | 3.2239      | -0.62649 | 0.41063  | C46         | 4.72715     | -2.55968 | 1.68548  |
| O3          | -2.40585    | -0.51297 | -1.67343 | C47         | 4.64047     | 3.52024  | -1.07348 |
| O4          | 2.40606     | -0.51302 | 1.67355  | C48         | 7.03795     | -2.21441 | 0.15317  |
| N5          | -0.0004     | 4.91846  | -0.00014 | C49         | 5.85387     | -3.34158 | 1.93588  |
| C6          | -0.00001    | 0.7148   | 0.00002  | C50         | 7.00713     | -3.17362 | 1.16715  |
| C7          | 0.00006     | -0.67966 | 0.00006  | H51         | 0.9165      | 0.92996  | -1.95824 |
| C8          | 0.54317     | 1.46519  | -1.09408 | H52         | -3.92745    | 0.44176  | 2.32844  |
| C9          | -3.7604     | 0.99581  | 0.24202  | H53         | 0.91738     | 3.35146  | -1.97233 |
| C10         | -4.05143    | 1.23244  | 1.59399  | H54         | 0.91043     | -2.20319 | 1.92773  |
| C11         | 0.53411     | 2.83045  | -1.10574 | H55         | -4.03308    | -2.30543 | 1.83468  |
| C12         | -0.17197    | -2.24426 | 1.90186  | H56         | -3.66445    | 1.85039  | -1.73139 |
| C13         | -2.26832    | -1.46948 | 0.92716  | H57         | -0.71302    | 6.721    | 0.78363  |
| C14         | -0.84693    | -1.46388 | 0.94594  | H58         | -0.12261    | 5.5914   | 2.01501  |
| C15         | -2.95044    | -2.24823 | 1.87238  | H59         | -1.68931    | 5.31051  | 1.21174  |
| C16         | -3.90584    | 2.03436  | -0.68913 | H60         | -0.33031    | -3.55286 | 3.59612  |
| C17         | -4.74587    | -1.60461 | -0.65791 | H61         | -5.9587     | -0.66631 | 0.87184  |
| C18         | -0.66723    | 5.67084  | 1.06734  | H62         | -2.82365    | -3.57279 | 3.56358  |
| C19         | -0.87521    | -2.97951 | 2.85285  | H63         | -4.46658    | 4.0887   | -0.99967 |
| C20         | -5.91421    | -1.42743 | 0.09897  | H64         | -4.72093    | 2.66636  | 3.05361  |
| C21         | -2.26772    | -2.98471 | 2.84021  | H65         | -3.83677    | -2.66832 | -2.29677 |
| C22         | -0.00024    | 3.56992  | -0.0001  | H66         | -4.99692    | 4.49459  | 1.39461  |
| C23         | -4.34516    | 3.29117  | -0.2726  | H67         | -7.93943    | -2.07163 | 0.43382  |
| C24         | -4.49113    | 2.49091  | 2.00692  | H68         | -5.83358    | -4.07669 | -2.73499 |
| C25         | -4.72673    | -2.55992 | -1.68557 | H69         | -7.88416    | -3.78207 | -1.36517 |
| C26         | -4.64074    | 3.51991  | 1.07377  | H70         | -0.91655    | 0.92999  | 1.95826  |
| C27         | -7.03769    | -2.21487 | -0.15346 | H71         | 3.92714     | 0.44219  | -2.32837 |
| C28         | -5.85336    | -3.34192 | -1.93608 | H72         | -0.91786    | 3.3515   | 1.97212  |
| C29         | -7.00669    | -3.17406 | -1.16745 | H73         | -0.91028    | -2.20321 | -1.9276  |
| C30         | -0.54329    | 1.46521  | 1.09407  | H74         | 4.03323     | -2.30518 | -1.83471 |
| C31         | 3.76035     | 0.99602  | -0.24187 | H75         | 3.66459     | 1.85041  | 1.73163  |
| C32         | 4.05119     | 1.2328   | -1.59386 | H76         | 0.71173     | 6.72118  | -0.78392 |
| C33         | -0.53445    | 2.83047  | 1.10561  | H77         | 0.12159     | 5.59145  | -2.0153  |
| C34         | 0.17212     | -2.24423 | -1.90175 | H78         | 1.68839     | 5.31096  | -1.21207 |
| C35         | 2.26845     | -1.46936 | -0.9271  | H79         | 0.33047     | -3.55276 | -3.59606 |
| C36         | 0.84706     | -1.46384 | -0.94583 | H80         | 5.95874     | -0.66594 | -0.87202 |
| C37         | 2.95058     | -2.24803 | -1.87237 | H81         | 2.82381     | -3.57254 | -3.56361 |
| C38         | 3.90584     | 2.0345   | 0.68935  | H82         | 4.46653     | 4.08883  | 1.00003  |
| C39         | 4.74612     | -1.60436 | 0.65782  | H83         | 4.72044     | 2.66689  | -3.05342 |
| C40         | 0.66621     | 5.67102  | -1.06764 | H84         | 3.83726     | -2.66816 | 2.29676  |
| C41         | 0.87537     | -2.97941 | -2.85279 | H85         | 4.99657     | 4.49497  | -1.39428 |
| C42         | 5.91438     | -1.42707 | -0.09915 | H86         | 7.93963     | -2.07109 | -0.43419 |
| C43         | 2.26787     | -2.98452 | -2.8402  | H87         | 5.83423     | -4.07636 | 2.73479  |
| C44         | 4.34506     | 3.29136  | 0.27289  | H88         | 7.88466     | -3.78156 | 1.36478  |



Table S 3. Cartesian coordinates for compound [5]<sup>+</sup>.

| Atom<br>Number | Coordinates |          |          | Atom<br>Number | Coordinates |          |          |
|----------------|-------------|----------|----------|----------------|-------------|----------|----------|
|                | X           | Y        | Z        |                | X           | Y        | Z        |
| N1             | -4.69231    | 0.00002  | -0.00003 | H23            | -0.11995    | 0.00116  | 0.00162  |
| C2             | -0.46846    | 0.00004  | 0.00008  | H24            | -0.72265    | 1.93824  | -0.85441 |
| C3             | 0.95005     | 0.00003  | 0.00009  | H25            | -3.09958    | 1.92149  | -0.90878 |
| C4             | -1.226      | 1.11079  | -0.49805 | H26            | 3.23422     | -0.58593 | 1.30364  |
| C5             | -2.59669    | 1.1101   | -0.51666 | H27            | 0.40954     | -2.28505 | -1.34405 |
| C6             | 2.8912      | -1.38619 | 0.7496   | H28            | 1.69419     | -4.33391 | -1.38537 |
| C7             | 1.27342     | -2.35939 | -0.78441 | H29            | -4.76025    | -1.93209 | 0.78118  |
| C8             | 1.70258     | -1.25719 | -0.00748 | H30            | -6.05996    | -1.54127 | -0.31931 |
| C9             | 2.00588     | -3.54276 | -0.8006  | H31            | -6.06009    | -0.88629 | 1.30059  |
| C10            | -5.44413    | -1.16919 | 0.47266  | H32            | 4.45156     | -2.67518 | 1.331    |
| C11            | 3.60135     | -2.58262 | 0.75342  | H33            | 3.69777     | -4.54452 | -0.02646 |
| C12            | 3.16454     | -3.66095 | -0.0248  | H34            | -0.72265    | -1.93814 | 0.85463  |
| C13            | -3.34289    | 0        | 0.00001  | H35            | -3.09958    | -1.9214  | 0.909    |
| C14            | -1.226      | -1.11071 | 0.49823  | H36            | 3.23413     | 0.58578  | -1.30363 |
| C15            | -2.59669    | -1.11003 | 0.51681  | H37            | 0.40977     | 2.28513  | 1.34428  |
| C16            | 2.8912      | 1.38608  | -0.74959 | H38            | 1.69445     | 4.33399  | 1.38522  |
| C17            | 1.27359     | 2.35941  | 0.78452  | H39            | -6.4932     | 0.97442  | -0.3941  |
| C18            | 1.70265     | 1.25714  | 0.00762  | H40            | -5.19335    | 1.36518  | -1.49444 |
| C19            | 2.00608     | 3.54278  | 0.8005   | H41            | -5.19339    | 2.02021  | 0.12543  |
| C20            | -5.44404    | 1.16924  | -0.47285 | H42            | 4.45158     | 2.67494  | -1.33118 |
| C21            | 3.60139     | 2.58247  | -0.75356 | H43            | 3.69787     | 4.54447  | 0.02612  |
| C22            | 3.16464     | 3.6609   | 0.0246   |                |             |          |          |

## 8 X-ray diffraction analysis

### 8.1 Experimental details

The crystallographic measurements were performed at 110(2) K using a three circle (Quest; Mo K $\alpha$  radiation,  $\lambda$  = 0.71073 Å) and kappa (Venture; Cu K $\alpha$  radiation,  $\lambda$  = 1.54178 Å) Bruker-AXS with I $\mu$ S source and a Photon III area detector diffractometer. In each case, a specimen of suitable size and quality was selected and mounted onto a nylon loop and cooled to 110(2) K in a cold nitrogen stream (OXFORD Cryosystems). The structure data was collected and reduced using Bruker AXS APEX 3 software<sup>6</sup> and solved by direct methods. Semiempirical absorption corrections were applied using SADABS.<sup>7</sup> Subsequent refinement using a difference map on F<sup>2</sup> using the SHELXTL/PC package (version 6.1 & OLEX<sup>2</sup>).<sup>8, 9</sup> Thermal parameters were refined anisotropically for all non-hydrogen atoms to convergence. H atoms were added at idealized positions using a riding model. The results of these X-ray measurements are provided as CIF files. CCDC 2296317-2296321 contain the supplementary crystallographic data for this paper. Crystal structure of **1** has been previously published<sup>1</sup> and structures [**2**][BF<sub>4</sub>] and [**4**][BF<sub>4</sub>] are presented in the text.

8.2 Table showing the compounds characterized by X-ray diffraction and their corresponding CCDC numbers.

| Compound                       | CCDC    |
|--------------------------------|---------|
| [ <b>2</b> ][BF <sub>4</sub> ] | 2296317 |
| [ <b>2</b> ]OH                 | 2296318 |
| <b>3</b>                       | 2296319 |
| [ <b>4</b> ][BF <sub>4</sub> ] | 2296320 |
| [ <b>4</b> ]OH                 | 2296321 |

### 8.3 Solid-state structures

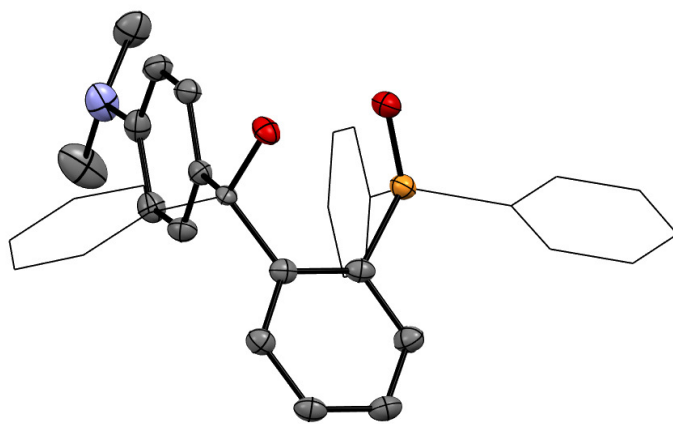

Figure S38. Solid-state structure of [2]OH. Hydrogens atoms were omitted for clarity.

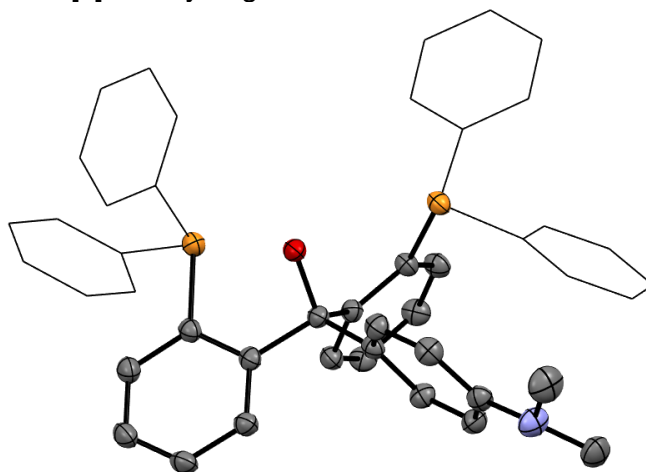

Figure S39. Solid-state structure of **3**. Hydrogens atoms and solvent were omitted for clarity.

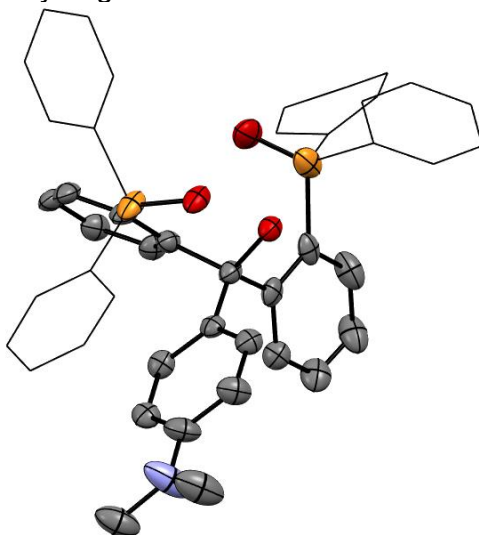

Figure S40. Solid-state structure of [4]OH. Hydrogens atoms and solvent were omitted for clarity.

## 8.4 X-ray refinement parameters

| Compound                                    | [2][BF <sub>4</sub> ]                                                           | [2]OH                                                                                                                 | 3                                                                                     |
|---------------------------------------------|---------------------------------------------------------------------------------|-----------------------------------------------------------------------------------------------------------------------|---------------------------------------------------------------------------------------|
| Empirical formula                           | C <sub>45</sub> H <sub>38</sub> NO <sub>2</sub> P <sub>2</sub> ·BF <sub>4</sub> | C <sub>45</sub> H <sub>39</sub> NOP <sub>2</sub> ·2.5(C <sub>6</sub> H <sub>6</sub> )·CH <sub>2</sub> Cl <sub>2</sub> | C <sub>45</sub> H <sub>39</sub> NO <sub>3</sub> P <sub>2</sub> ·0.5(H <sub>2</sub> O) |
| Formula weight                              | 773.51                                                                          | 951.90                                                                                                                | 712.72                                                                                |
| Temperature/K                               | 110.0                                                                           | 110.01                                                                                                                | 109.99                                                                                |
| Crystal system                              | monoclinic                                                                      | triclinic                                                                                                             | triclinic                                                                             |
| Space group                                 | C2/m                                                                            | P-1                                                                                                                   | P-1                                                                                   |
| a/Å                                         | 12.224(2)                                                                       | 13.849(3)                                                                                                             | 12.0136(17)                                                                           |
| b/Å                                         | 25.959(5)                                                                       | 13.924(3)                                                                                                             | 12.8997(18)                                                                           |
| c/Å                                         | 12.870(2)                                                                       | 14.623(3)                                                                                                             | 13.4490(19)                                                                           |
| α/°                                         | 90                                                                              | 115.720(5)                                                                                                            | 71.834(3)                                                                             |
| β/°                                         | 91.755(5)                                                                       | 90.378(5)                                                                                                             | 71.445(3)                                                                             |
| γ/°                                         | 90                                                                              | 96.195(5)                                                                                                             | 67.410(3)                                                                             |
| Volume/Å <sup>3</sup>                       | 4082.1(13)                                                                      | 2520.9(9)                                                                                                             | 1781.0(4)                                                                             |
| Z                                           | 4                                                                               | 2                                                                                                                     | 2                                                                                     |
| ρ <sub>calc</sub> /cm <sup>3</sup>          | 1.259                                                                           | 1.254                                                                                                                 | 1.329                                                                                 |
| μ/mm <sup>-1</sup>                          | 1.435                                                                           | 0.235                                                                                                                 | 0.168                                                                                 |
| F(000)                                      | 1608.0                                                                          | 1002.0                                                                                                                | 750.0                                                                                 |
| Crystal size/mm <sup>3</sup>                | 0.21 × 0.177 × 0.082                                                            | 0.275 × 0.24 × 0.15                                                                                                   | 0.169 × 0.149 × 0.053                                                                 |
| Radiation                                   | CuKα (λ = 1.54178)                                                              | MoKα (λ = 0.71073)                                                                                                    | MoKα (λ = 0.71073)                                                                    |
| 2θ range for data collection/°              | 7.998 to 136.482                                                                | 4.638 to 61.316                                                                                                       | 4.244 to 54.97                                                                        |
| Index ranges                                | -14 ≤ h ≤ 14, -31 ≤ k ≤ 29, -15 ≤ l ≤ 15                                        | -19 ≤ h ≤ 19, -19 ≤ k ≤ 19, -20 ≤ l ≤ 20                                                                              | -15 ≤ h ≤ 15, -16 ≤ k ≤ 16, -17 ≤ l ≤ 17                                              |
| Reflections collected                       | 26069                                                                           | 57558                                                                                                                 | 40080                                                                                 |
| Independent reflections                     | 3817 [R <sub>int</sub> = 0.0535, R <sub>sigma</sub> = 0.0348]                   | 15420 [R <sub>int</sub> = 0.0632, R <sub>sigma</sub> = 0.0629]                                                        | 8168 [R <sub>int</sub> = 0.1538, R <sub>sigma</sub> = 0.1395]                         |
| Data/restraints/parameters                  | 3817/0/256                                                                      | 15420/0/607                                                                                                           | 8168/36/526                                                                           |
| Goodness-of-fit on F <sup>2</sup>           | 1.112                                                                           | 1.023                                                                                                                 | 1.180                                                                                 |
| Final R indexes [I >= 2σ (I)]               | R <sub>1</sub> = 0.0453, wR <sub>2</sub> = 0.1249                               | R <sub>1</sub> = 0.0562, wR <sub>2</sub> = 0.1206                                                                     | R <sub>1</sub> = 0.1369, wR <sub>2</sub> = 0.2074                                     |
| Final R indexes [all data]                  | R <sub>1</sub> = 0.0485, wR <sub>2</sub> = 0.1288                               | R <sub>1</sub> = 0.0946, wR <sub>2</sub> = 0.1465                                                                     | R <sub>1</sub> = 0.2190, wR <sub>2</sub> = 0.2382                                     |
| Largest diff. peak/hole / e Å <sup>-3</sup> | 0.54/-0.48                                                                      | 0.70/-0.90                                                                                                            | 0.38/-0.34                                                                            |
| CCDC identifier                             | 2296317                                                                         | 2296318                                                                                                               | 2296319                                                                               |

| Compound                                    | [4][BF <sub>4</sub> ]                                                                       | [4]OH                                                         |
|---------------------------------------------|---------------------------------------------------------------------------------------------|---------------------------------------------------------------|
| Empirical formula                           | 2(C <sub>33</sub> H <sub>29</sub> NOP)·2(BF <sub>4</sub> )·C <sub>4</sub> H <sub>10</sub> O | C <sub>33</sub> H <sub>30</sub> NO <sub>2</sub> P             |
| Formula weight                              | 1220.82                                                                                     | 503.55                                                        |
| Temperature/K                               | 110.0                                                                                       | 293(2)                                                        |
| Crystal system                              | monoclinic                                                                                  | monoclinic                                                    |
| Space group                                 | Pc                                                                                          | P2 <sub>1</sub> /c                                            |
| a/Å                                         | 8.3585(6)                                                                                   | 15.3105(10)                                                   |
| b/Å                                         | 14.7884(10)                                                                                 | 10.7158(8)                                                    |
| c/Å                                         | 25.0191(17)                                                                                 | 15.7073(11)                                                   |
| α/°                                         | 90                                                                                          | 90                                                            |
| β/°                                         | 90.077(4)                                                                                   | 92.104(2)                                                     |
| γ/°                                         | 90                                                                                          | 90                                                            |
| Volume/Å <sup>3</sup>                       | 3092.6(4)                                                                                   | 2575.3(3)                                                     |
| Z                                           | 2                                                                                           | 4                                                             |
| ρ <sub>calc</sub> /cm <sup>3</sup>          | 1.311                                                                                       | 1.299                                                         |
| μ/mm <sup>-1</sup>                          | 1.256                                                                                       | 0.139                                                         |
| F(000)                                      | 1276.0                                                                                      | 1064.0                                                        |
| Crystal size/mm <sup>3</sup>                | 0.257 × 0.027 × 0.02                                                                        | 0.326 × 0.12 × 0.11                                           |
| Radiation                                   | CuKα (λ = 1.54178)                                                                          | MoKα (λ = 0.71073)                                            |
| 2θ range for data collection/°              | 5.976 to 136.522                                                                            | 4.602 to 54.972                                               |
| Index ranges                                | -10 ≤ h ≤ 10, -17 ≤ k ≤ 17, -30 ≤ l ≤ 29                                                    | -19 ≤ h ≤ 19, -13 ≤ k ≤ 13, -20 ≤ l ≤ 20                      |
| Reflections collected                       | 52504                                                                                       | 40373                                                         |
| Independent reflections                     | 10607 [R <sub>int</sub> = 0.1138, R <sub>sigma</sub> = 0.0885]                              | 5895 [R <sub>int</sub> = 0.0426, R <sub>sigma</sub> = 0.0256] |
| Data/restraints/parameters                  | 10607/2/790                                                                                 | 5895/0/337                                                    |
| Goodness-of-fit on F <sup>2</sup>           | 1.028                                                                                       | 1.121                                                         |
| Final R indexes [I >= 2σ (I)]               | R <sub>1</sub> = 0.0579, wR <sub>2</sub> = 0.1402                                           | R <sub>1</sub> = 0.0544, wR <sub>2</sub> = 0.1326             |
| Final R indexes [all data]                  | R <sub>1</sub> = 0.0681, wR <sub>2</sub> = 0.1481                                           | R <sub>1</sub> = 0.0631, wR <sub>2</sub> = 0.1371             |
| Largest diff. peak/hole / e Å <sup>-3</sup> | 0.36/-0.48                                                                                  | 0.56/-0.54                                                    |
| CCDC identifier                             | 2296320                                                                                     | 2296321                                                       |

## 9 References

1. E. D. Litle, L. C. Wilkins and F. P. Gabbaï, *Chem. Sci.*, **2021**, 12, 3929-3936.
2. GaussView, Version 6.1.1, R. Dennington, T. A. Keith and J. M. Millam, Semichem Inc., Shawnee Mission, KS, 2019.
3. E. D. Glendening, C. R. Landis and F. Weinhold, *J. Comput. Chem.*, **2013**, 34, 1429-1437.
4. M. D. Hanwell, D. E. Curtis, D. C. Lonie, T. Vandermeersch, E. Zurek and G. R. Hutchison, *J. Cheminform.*, **2012**, 4, 17.
5. AIMAll (Version 14.06.21), T. A. Keith, TK Gristmill Software, Overland Park KS, USA, 2014.
6. Bruker, **2019**, APEX3 (v2019.2011-2010), Bruker AXS Inc., Madison, Wisconsin, USA.
7. SADABS., G. M. Sheldrick, University of Göttingen, Germany, 2016.
8. G. M. Sheldrick, *Acta Crystallograph., Sect. A*, **2015**, 71, 3-8.
9. O. V. Dolomanov, L. J. Bourhis, R. J. Gildea, J. A. K. Howard and H. Puschmann, *J. Appl. Crystallogr.*, **2009**, 42, 339-341.
